# Supplementary material for: Evidence for RNA or protein transport from somatic tissues to the male reproductive tract in mouse
Source: eLife. 2023 Mar 27;12:e77733. doi: 10.7554/eLife.77733 (PMC10079288; doi:10.7554/eLife.77733)
Supplement: Supplementary file 1. — Table lists oligo sequences used for genotyping PCRs. [file elife-77733-supp1.xlsx]

## Sheet: Sheet1
Primer Set		Sequence	Full-length (bp)	Recombined (bp)
Rec7	Forward	GCA ACG TGC TGG TTA TTG TG	1118	248
	Reverse	CTC ACC ATG GTG GCG GGA TC
Rec11	Forward	GGT TCG GCT TCT GGC GTG TGA CC	1202	332
	Reverse	CTC ACC ATG GTG GCG GGA TC
SeqRec	Forward	GCA ACG TGC TGG TTA TTG TG	1711	807
	Reverse	CCA GCT TGG TGT CCA CGT AGT A
Dcr1KO	3loxP_F5	CTT CAC TGC CTT CTG ACT GC	4500	825
	Dcr1flx_geno_R	CTG GTG GCT TGA GGA CAA GAC
