# Supplementary material for: Evidence for RNA or protein transport from somatic tissues to the male reproductive tract in mouse
Source: eLife. 2023 Mar 27;12:e77733. doi: 10.7554/eLife.77733 (PMC10079288; doi:10.7554/eLife.77733)
Supplement: Supplementary file 2. — Table shows mRNA abundance (expressed as FPKM) for RNA-Seq libraries obtained from FACS-isolated Tomato-positive cells obtained from the cauda epididymis of Ai14D animals carrying either Defb41Cre or Slc32a1Cre, as indicated. [file elife-77733-supp2.xlsx]

## Sheet: Epididymis_SS3_FPKM(1)
GeneName	Defb41:Cre_rep1	Defb41:Cre_rep2	Vgat:Cre_rep1	Vgat:Cre_rep2
a	0	0	0	0.518556
A1bg	0	0	0	0
A1cf	0	0	0.001544	0
A26c3	0	0	0	0
A2m	0.002828	0.00237	0	0.007648
A2ml1	0	8.59286	23.2454	5.88
A3galt2	0	0.48892	0.574436	0.666249
A4galt	0	1.13862	4.95439	30.1545
A4gnt	0	0	0	0
AA387883	0	0	0	0
AA388235	0	0.118369	0.005377	0.175095
AA413626	0	0.47631	0	0.362616
AA414768	8.38031	7.93133	3.42805	15.2497
AA465934	46.5176	9.58607	6.64912	6.00179
AA467197	0	1.09012	0	0
AA536875	0	0	0	0
AA543186	0	1.53881	0.518006	0.113928
AA543401	0	0	0	0
AA545190	0.09444	0	0	0.713807
AA619741	0	0	0	0
AA623943	0.084277	0	0.093126	0
AA792892	0	0	0	0
AA986860	0	1.82857	9.58309	5.74691
Aaas	0.04946	7.76091	0	8.01038
Aacs	20.1389	13.6914	5.41195	12.4394
Aadac	0	0	0	0
Aadacl2	0	0	0	0
Aadacl2fm1	0	0	0	0.127499
Aadacl2fm2	0	0	0	0
Aadacl2fm3	0	0	0	0
Aadacl3	0	0	0	0
Aadacl4	0	0	0	0
Aadacl4fm1	0	0	0	0
Aadacl4fm2	0	0	0.010218	0
AAdacl4fm3	0	0	0	0
Aadacl4fm4	0	0	0	0
Aadacl4fm5	0	0	0	0
Aadat	0	0.149314	0.015187	0.060206
Aagab	2.37359	3.72687	7.40394	3.83978
Aak1	0.217403	0.875673	1.10338	0.95593
Aamdc	19.9615	43.8112	18.0631	32.6145
Aamp	28.0988	99.2842	91.9185	82.8309
Aanat	0.012709	0.129391	0	0
Aar2	3.10384	3.79629	0.003476	4.27412
Aard	0	0	3.30726	0.822698
Aars	5.61096	20.969	22.8444	22.6454
Aars2	0	1.41237	0.020059	0.910692
Aarsd1	11.0634	42.472	42.49	40.2238
Aasdh	26.8741	2.34335	0	0.945482
Aasdhppt	106.084	15.0915	8.56258	11.7573
Aass	0.213068	6.38741	6.92837	2.86003
Aatf	9.94105	5.89395	0.050251	3.98171
Aatk	0	0.160776	0.001992	0.853158
AB124611	0	0.064961	0	0.704396
Abat	0	1.22888	1.37728	4.43185
Abca1	1.41202	1.74029	0.63638	5.48644
Abca12	0	0	0	0.054234
Abca13	0	0.01199	0.313771	0.038435
Abca14	0	0	0	0
Abca15	0	0	0	0.017957
Abca16	0	0.1312	0	0.010582
Abca17	0	0	0.020607	0.056167
Abca2	3.33529	20.5064	9.90132	9.67247
Abca3	1.05686	19.8404	17.5651	6.90786
Abca4	0	0.121215	0.001722	0.12814
Abca5	1.26848	0.664266	1.92209	2.68171
Abca6	0	0	0	0.349499
Abca7	0	0.407044	2.60804	0.813065
Abca8a	0	0	0.005184	2.28523
Abca8b	0	0.050834	0	0.158052
Abca9	0	0	0.072154	0.183407
Abcb10	0.066872	3.16333	2.10691	4.29006
Abcb11	0	0.090613	0	0.060113
Abcb1a	0	0	0.183557	2.62799
Abcb1b	0	0.172503	0.07635	1.04472
Abcb4	0	0	0.199263	0
Abcb5	0	14.4475	38.7207	11.1243
Abcb6	0	5.25195	4.27838	3.11238
Abcb7	0.083716	1.88833	0.877932	0.673
Abcb8	3.74607	8.83302	8.18385	4.40777
Abcb9	2.23408	4.98019	0.670154	7.40265
Abcc1	4.56597	2.76156	1.24412	3.91552
Abcc10	1.22307	1.46344	0.966657	0.788597
Abcc12	0	0.028642	0	0.028436
Abcc2	0	0	0	0.065684
Abcc3	0	5.74195	2.61031	1.08603
Abcc4	3.56894	2.00883	0	3.09401
Abcc5	6.18455	1.22125	2.32289	2.84804
Abcc6	0	0.075943	0.002726	0.060586
Abcc8	2.30006	1.54977	0.222131	0.564299
Abcc9	0	0	0.581222	0.930976
Abcd1	0	0.542379	1.59545	1.01259
Abcd2	0	0	0	0.020933
Abcd3	0.610931	9.34783	14.2716	12.9075
Abcd4	0	0.787363	5.96248	1.6764
Abce1	0.401916	6.94355	2.13283	8.15289
Abcf1	10.2701	20.591	8.80403	21.6356
Abcf2	23.5886	9.69665	13.0423	9.95605
Abcf3	23.4596	12.6561	13.3737	16.491
Abcg1	141.558	2.71304	7.26264	6.49848
Abcg2	0.08906	0.228354	0.22674	15.2757
Abcg3	0	0	0	0.078135
Abcg4	0	0	1.12313	0.269574
Abcg5	0	0	0	1.10986
Abcg8	0	0	0	0.006659
Abhd1	0.297553	2.25699	3.55876	1.11837
Abhd10	2.16068	4.36327	9.84584	8.57422
Abhd11	9.70439	39.2457	48.315	24.7951
Abhd11os	0	101.316	12.4214	19.9607
Abhd12	28.8152	139.681	81.3499	78.712
Abhd12b	0	0	0	0.157093
Abhd13	2.4964	2.48921	0.761703	3.00199
Abhd14a	6.02109	5.75044	2.56527	18.1658
Abhd14b	17.6352	62.0783	33.7691	46.8466
Abhd15	0.003659	0.059081	0.054401	0.035483
Abhd16a	25.8688	47.4759	88.2475	56.577
Abhd16b	0	0.299473	0	0
Abhd17a	5.39469	22.2161	2.28195	22.8069
Abhd17b	0	0.60703	2.47635	2.32175
Abhd17c	0.038363	1.8523	0	1.52649
Abhd18	0	1.23837	1.17737	1.40283
Abhd2	40.0394	24.5759	26.1129	21.0753
Abhd3	4.31961	2.96761	6.34889	4.71625
Abhd4	11.7643	7.09807	12.6259	22.8024
Abhd5	3.08861	6.77775	10.4289	14.8559
Abhd6	0.159313	0.310145	0.022064	5.25598
Abhd8	0	4.05962	0.696618	6.99383
Abi1	21.6017	11.3225	8.61762	12.8034
Abi2	0.034934	1.47681	5.30896	2.97019
Abi3	0	0	0	0.185282
Abi3bp	0	0	0.80246	9.73988
Abitram	0	1.66495	0.053447	0.932531
Abl1	0.518514	0.312747	1.22543	0.424755
Abl2	2.89658	2.81834	5.13373	4.92919
Ablim1	3.08635	2.18222	3.11405	2.30803
Ablim2	0.524346	1.36232	0.017139	2.5666
Ablim3	0	0	0.005698	0.101794
Abo	0	9.91231	10.8742	1.20037
Abr	0.043618	4.73393	0.923211	2.7989
Abra	0	0.100561	0	0
Abracl	24.0219	74.0066	29.5224	47.5107
Abraxas1	1.81455	1.23638	0	2.54895
Abraxas2	1.44498	4.83772	1.51949	5.29235
Abt1	1.93507	4.06585	0.46128	2.83312
Abtb1	3.29094	17.2456	9.51372	6.90683
Abtb2	0.002609	0.056693	2.07778	2.45908
Acaa1a	12.661	82.7754	22.2617	52.4853
Acaa1b	0	0.373785	0	0.104096
Acaa2	24.7056	51.2294	43.1735	104.566
Acaca	0.240864	0.915086	0.970508	1.05006
Acacb	0	0.438097	0	0.159405
Acad10	2.58119	1.7983	0	2.07392
Acad11	4.34499	9.76227	2.95363	6.05645
Acad12	0.694641	2.16822	0	1.90744
Acad8	9.2	33.2997	16.7701	22.7456
Acad9	1.21242	6.74757	1.23473	7.80943
Acadl	28.43	14.2881	24.1931	25.601
Acadm	5.83504	15.8845	4.41188	13.6645
Acads	2.95466	15.9027	7.90832	6.26996
Acadsb	6.62291	15.8329	12.0921	17.8274
Acadvl	1.63841	21.6305	25.1807	33.8056
Acan	0.002051	0.011945	0.002961	0.007567
Acap1	35.6907	25.4904	16.6505	21.141
Acap2	2.98962	1.86532	2.65247	3.82634
Acap3	0	1.75496	2.74365	2.49318
Acat1	6.83933	18.6497	24.685	26.857
Acat2	14.8325	77.2849	31.9359	47.0861
Acat3	0.24613	13.1124	9.39718	3.30781
Acbd3	7.79776	7.54554	10.2882	14.735
Acbd4	2.61312	10.948	21.8034	11.8548
Acbd5	9.55271	3.26314	1.40415	3.74544
Acbd6	15.1082	56.3407	17.5305	33.6972
Acbd7	2.75038	209.686	686.215	199.95
Accs	0	0.963554	0	1.38553
Accsl	0.07128	0	0.048366	0.044717
Acd	7.13454	13.6365	7.05573	15.6634
Ace	3.97429	112.358	11.9892	8.32262
Ace2	0	0.072916	0	1.44286
Ace3	0	0	0	0
Acer1	0	0	0	0.128346
Acer2	0	0.364789	0.007801	1.31707
Acer3	2.42403	1.50276	7.13299	3.61387
Ache	0	0.659179	4.47039	3.3568
Acin1	3.81392	25.2257	10.0539	28.8987
Ackr1	0	0.232707	0	2.91091
Ackr2	0	0	0	0
Ackr3	0.008543	5.84513	19.3471	12.8653
Ackr4	0.046347	6.63544	4.84449	3.26052
Acly	36.2606	59.4829	49.5002	34.672
Acmsd	0	0	0.004063	0.047943
Acnat1	38.27	0.513346	0	0.368939
Acnat2	0	0.317565	0	0.228746
Aco1	4.23053	20.9801	6.36356	17.315
Aco2	10.9058	22.3405	26.5267	30.8224
Acod1	0	0	0.502168	0
Acot1	2.67566	14.2633	5.54546	18.2048
Acot10	0	0.7085	0.565505	0.463767
Acot11	0	0.032595	0	0.609173
Acot12	0	0.085958	0	0.039408
Acot13	50.3973	87.3885	30.3192	62.9106
Acot2	407.695	7.92528	10.4366	10.5408
Acot3	0.032676	0	0	0
Acot4	0	0.346118	0	0.517494
Acot5	0	0.167572	0	0
Acot6	0.034073	2.40894	0	1.03821
Acot7	0.014692	0.89108	0.127116	12.516
Acot8	14.786	20.3187	9.91576	10.8836
Acot9	0.035759	59.0178	77.1519	49.0845
Acox1	29.1093	17.1759	8.70055	27.4166
Acox2	0	0	0.00633	0
Acox3	12.9341	29.6779	5.90442	29.1833
Acoxl	0	0.589644	0	0.160045
Acp1	3.73716	8.63489	5.30244	8.93325
Acp2	6.7165	6.59462	1.12192	5.66686
Acp4	0	0.213744	0	0.132133
Acp5	0	2.61779	0	3.07059
Acp6	3.95209	10.8136	0.333933	12.4645
Acp7	0.007421	0	0	0
Acpp	0.228597	1.98624	1.11852	1.06685
Acr	0.010958	0	0	0
Acrbp	0	3.15158	0	3.93906
Acrv1	0	0	0	0.36869
Acsbg1	0	12.8009	2.8302	11.3081
Acsbg2	0	0	0	0.122027
Acsbg3	1.21315	0.175386	0.010891	0.115415
Acsf2	1.18014	0.744535	0.168031	0.712127
Acsf3	2.52398	3.29944	1.76216	3.3209
Acsl1	17.7224	37.9607	12.5982	21.2165
Acsl3	3.52222	5.12966	5.69639	11.6114
Acsl4	106.724	10.4765	8.11628	16.7039
Acsl5	2.47575	6.49834	9.82377	7.77847
Acsl6	0	0.079963	0	0.21006
Acsm1	0	0.023385	0	0.375859
Acsm2	0	0.03244	0	0.04242
Acsm3	0	0.318565	0	1.09126
Acsm4	0	0.077154	0	0.109354
Acsm5	0	0.074094	0	0
Acss1	15.9332	5.07287	0	9.91139
Acss2	3.22549	5.09605	5.80032	6.28222
Acss2os	0	0	0	0.232327
Acss3	1.18519	0.637355	0.011151	2.1096
Acta1	0	0.16683	0.07346	44.5944
Acta2	16.9033	25.2256	174.786	426.802
Actb	554.978	837.644	923.55	1324.99
Actbl2	0	0	0	0
Actc1	0	0	0	0.080129
Acte1	0	0	0	0.257542
Actg1	20.4626	143.531	96.4009	205.753
Actg2	323.35	501.198	233.042	700.975
Actl10	0.009679	0.127885	0	0
Actl11	0	0	0.004166	0
Actl6a	3.2455	33.1421	11.0569	21.1553
Actl6b	0	0	0	0
Actl7a	0	0	0	0
Actl7b	0	0	0	0
Actl9	0	0	0	0
Actn1	0	3.6798	35.5238	14.63
Actn2	0	0.616059	0	0
Actn3	0.004576	0	0	0.647349
Actn4	10.7747	17.562	25.2823	30.5847
Actr10	2.76756	12.566	6.29938	15.4525
Actr1a	89.2784	20.6472	14.578	26.172
Actr1b	8.76407	12.7164	24.1932	24.2556
Actr2	10.3856	8.06619	9.3955	16.3332
Actr3	12.7609	8.3628	10.0376	13.4867
Actr3b	0	3.76999	0	2.68827
Actr5	4.1021	3.08575	0.302678	0.827909
Actr6	1.30494	5.76263	0.258968	3.8494
Actr8	2.58695	14.3392	24.4952	11.9486
Actrt1	0	0	0	0
Actrt2	0	0	0	0.057507
Actrt3	0	0	0	0
Acvr1	0.878659	1.62091	1.9994	2.45308
Acvr1b	2.22839	4.60485	0.002356	2.38571
Acvr1c	0	0.059557	0.438557	0.102637
Acvr2a	1.10232	1.35999	1.82243	1.9424
Acvr2b	0.797155	0.994665	0.184037	1.08664
Acvrl1	0.632193	1.40328	0.221222	9.63234
Acy1	1.95299	13.5224	21.0526	14.1308
Acy3	7.54256	11.4853	6.56608	5.75255
Acyp1	6.58172	75.505	8.32346	28.8659
Acyp2	1.5571	1.65041	7.15542	6.20447
Ada	0	1.32795	10.9613	1.53986
Adad1	0	0.816152	1.4272	0.205846
Adad2	0.008078	0.752582	0	0
Adal	0	2.25925	2.15448	0.934811
Adam10	10.2052	8.08858	15.1071	11.6067
Adam11	0	0.375213	2.72262	3.49642
Adam12	0	0	0.015443	0
Adam15	6.33203	8.3158	12.7315	16.3015
Adam17	3.47811	2.70893	1.59747	4.67228
Adam18	0	0.372113	0	0.03026
Adam19	0	0	2.66204	0.448237
Adam1a	0.005126	0.079989	0	0.711557
Adam1b	0	0.033156	0	0
Adam2	0	0	0	0.02942
Adam20	0	0	0	0
Adam21	0	0.091023	0	0.386467
Adam22	0.001956	0.041403	0.38525	0.778269
Adam23	0	0.043673	0.000831	0.718795
Adam24	0.004117	0	0	0
Adam25	0	0	0	0.044418
Adam26a	0	0	0	0
Adam26b	0	0	0	0
Adam28	180.659	116.662	41.6256	189.715
Adam29	0	0	0	0
Adam3	0	0.067461	0.00076	0.150739
Adam30	0	0	0	0
Adam32	0	0.544151	0.05012	0.118382
Adam33	0	7.8571	0	0.358656
Adam34	0	0	0	0
Adam34l	0	0	0	0
Adam39	0.00487	0	0	0
Adam4	0	0	0	0
Adam5	0	0.016209	0.105002	0.083405
Adam6a	0	0	0	0
Adam6b	0	0	0	0
Adam7	968.95	1010.72	379.452	741.347
Adam8	0	0.061584	0.003669	0.080742
Adam9	1.45561	5.94611	2.13627	12.2359
Adamdec1	0	0.586155	0	1.77518
Adamts1	0	7.82809	25.2649	55.2285
Adamts10	0.015131	0.813546	5.10437	4.97418
Adamts12	0	0.37274	0.121997	0.669762
Adamts13	0	0.102824	0	0
Adamts14	0	0.077128	2.34408	1.19839
Adamts15	0.080408	1.31246	0.345195	1.06458
Adamts16	0	0.039432	0	0.009145
Adamts17	0	0.156741	0.669444	0.312677
Adamts18	0	0	0	0.034312
Adamts19	0	0	0	0.058642
Adamts2	0	0.069613	7.12943	12.5293
Adamts20	0	0	0	0.01744
Adamts3	0	0	0	0.047815
Adamts4	0.074928	3.04683	32.3207	37.3701
Adamts5	0	0.02323	1.48076	3.97654
Adamts6	0	0.075482	0.006451	0.155708
Adamts7	0	0.095792	0.110961	0.713638
Adamts8	0	0.073621	2.00343	3.92958
Adamts9	0.001967	0.953436	3.31573	2.61543
Adamtsl1	0	0.262002	10.8302	13.5205
Adamtsl2	0	0.517126	0	0.449083
Adamtsl3	4.47193	0.21738	0	0.767838
Adamtsl4	6.82168	1.00425	5.6168	5.41707
Adamtsl5	0	0.364058	0.3155	5.42774
Adap1	0	0.043086	0	0.10017
Adap2	0.267152	0.071654	2.2213	0.83575
Adar	0.589275	0.700039	0.475156	0.674882
Adarb1	0	0.494867	0.286667	0.539705
Adarb2	0	0.040174	0.009901	0
Adat1	0.136012	2.0119	0	1.21125
Adat2	0.040907	3.00038	9.82876	1.93773
Adat3	4.58983	5.85759	14.1445	2.47067
Adck1	0	2.4698	0.598002	3.39006
Adck2	1.90498	3.40352	5.40028	3.06758
Adck5	10.0994	27.3898	23.5183	20.5639
Adcy1	0	0.059653	0.859091	0.772694
Adcy10	0	0	0	0.037159
Adcy2	0.022584	0.317332	0	0
Adcy3	3.68141	0.775742	1.79605	1.67246
Adcy4	0	0.018822	0.299831	1.08508
Adcy5	0	0.830645	4.06095	6.14635
Adcy6	0.260667	8.73195	8.83625	5.02448
Adcy7	0.512679	1.28171	0.511542	2.59485
Adcy8	3.25802	7.84653	1.22209	2.786
Adcy9	2.47276	0.990653	1.10003	1.94928
Adcyap1	0	0	0	0.029315
Adcyap1r1	0	0.008276	1.68315	2.62368
Add1	2.22086	15.5724	13.6472	14.0759
Add2	0	0.006944	0.002825	0.011312
Add3	0.002474	0.208853	11.3929	14.6899
Adgb	0	0.052267	0	0.049658
Adgra1	0	0	5.87213	0.12456
Adgra2	0.090261	0.323844	10.8454	9.19545
Adgra3	0	0.749829	0.194463	1.36319
Adgrb1	0	0.171115	0	0.232553
Adgrb2	0	0.146364	0.528233	0.307674
Adgrb3	0	0	0.013557	0.178485
Adgrd1	0	0.038608	5.85332	3.42574
Adgre1	0	0	0	0.498373
Adgre4	0	0	0	0
Adgre5	0	50.0563	28.5605	14.2965
Adgrf1	0	0.229661	0	0.349396
Adgrf2	0	0	0	0
Adgrf3	0	0.22632	0.597847	0.225821
Adgrf4	0	0	0	0
Adgrf5	0	0.247542	0	0.560469
Adgrg1	6.47578	4.5547	0.377641	11.6771
Adgrg2	37.1033	159.934	90.5583	160.573
Adgrg3	0	0.068136	0	0
Adgrg4	0	0	0	0.023856
Adgrg5	0	0	0	0
Adgrg6	0.029646	0.845536	0.025093	1.7605
Adgrg7	0	0.784476	1.00851	1.07606
Adgrl1	10.3274	6.00868	5.37597	10.9894
Adgrl2	0.24139	2.06651	3.25152	2.25823
Adgrl3	0.006371	0.058287	0.207157	0.233993
Adgrl4	0	0	0	0.934446
Adgrv1	0	0.005537	0	0.029151
Adh1	0	78.6982	158.796	92.3371
Adh4	0	0.126612	0	0.460383
Adh5	10.1058	170.133	275.69	137.725
Adh6a	0	0.335833	3.11752	1.05705
Adh6b	0	5.08761	1.73701	1.48982
Adh7	0	0.040838	0	0.306935
Adhfe1	1.15731	5.33612	11.5916	6.09529
Adi1	11.1434	61.7292	29.3286	57.4523
Adig	19.0962	120.911	101.455	61.6189
Adipoq	0	0	0	0.419108
Adipor1	38.9382	35.5204	23.229	38.0699
Adipor2	4.75899	6.35882	14.7822	10.0311
Adk	6.39389	19.9315	57.0372	27.7706
Adm	0.052115	17.7686	28.1186	75.2068
Adm2	0	0.341533	0	0
Adnp	15.2192	7.38138	4.15288	6.92865
Adnp2	0.068755	1.50988	2.94703	1.51826
Ado	508.826	8.83447	17.9257	11.1391
Adora1	0.005674	6.47059	2.90431	4.11104
Adora2a	0	0	0.001253	1.03947
Adora2b	0	4.58824	1.21842	4.12356
Adora3	0	0	1.18083	0.61471
Adpgk	0.143259	7.28721	10.7446	7.25053
Adprh	5.66983	28.2441	9.48331	38.5219
Adprhl1	0	0.392818	0	0
Adprhl2	8.32691	10.8745	9.32301	12.8461
Adprm	0	8.59267	13.67	8.19366
Adra1a	0	0.092455	0	0.806023
Adra1b	0	0	0	0.396483
Adra1d	0	0.17848	0	0.347049
Adra2a	0	0.052536	1.19548	0.541965
Adra2b	0	0.069391	0	0.020884
Adra2c	1.87847	1.9923	0.020807	2.33961
Adrb1	0	0.148435	0	0.28043
Adrb2	0	0.411603	22.2015	5.00424
Adrb3	0	0	0	0.131292
Adrm1	17.1085	37.6296	30.0077	26.8487
Adsl	2.71043	6.65687	8.68444	7.01933
Adss	0	12.1558	15.2993	15.5592
Adssl1	0.576731	3.22973	1.07626	2.57927
Adtrp	0	0.322242	0	0.437883
Aebp1	0.008104	1.75286	31.3777	50.3021
Aebp2	0.957347	2.0454	2.92015	4.94912
Aen	0.082971	10.5067	6.21802	1.35523
AF067061	0	0	0.013862	0
AF067063	0	0	0.023469	0
AF357355	0	1.14382	13.721	5.1227
AF357359	0	0	0	9.14692
AF357399	0	2.23841	18.4379	1.29552
AF357425	0	0	13.6365	1.76491
AF357426	0	0	0	0
AF366264	0	0	0	0.036516
Afap1	1.57758	0.944469	3.28059	2.90904
Afap1l1	10.869	2.54917	0	5.45564
Afap1l2	0	1.61154	0.746536	2.16442
Afdn	2.96535	3.29255	2.71624	4.00593
Aff1	33.4068	6.08271	27.3594	10.6065
Aff2	0	0.178565	2.62704	1.23534
Aff3	0	0.485671	0.073557	1.08583
Aff4	1.7775	6.17426	3.05514	10.1755
Afg1l	6.53719	2.82474	0	2.40359
Afg3l1	1.06803	17.875	6.13339	9.68578
Afg3l2	15.4289	18.8791	10.3729	12.8255
Afm	0.007186	0	0	0.116438
Afmid	0	2.38177	2.82215	0.982113
Afp	0	0.166342	0	0.527746
Aftph	9.01133	5.01466	5.13279	6.54704
Aga	34.4103	55.7489	50.5733	62.8428
Agap1	1.62583	2.78253	1.1863	2.11213
Agap2	0.060722	0	0.012549	0.128825
Agap3	5.35553	10.0221	2.99157	7.05367
Agbl1	0	0	0	0.084342
Agbl2	0.00334	0	0	0.021165
Agbl3	10.1077	1.12952	0.052216	1.74373
Agbl4	0	0.273559	0	0.121767
Agbl5	0	2.21538	1.56365	1.42851
Ager	0.451694	2.37693	7.43426	31.5896
Agfg1	0.059722	0.631353	1.44496	2.00306
Agfg2	14.3154	8.50093	9.80249	8.49177
Aggf1	3.23237	3.44751	1.82984	7.49084
Agk	0	1.21443	4.2625	1.87256
Agl	0.00159	1.0567	0.604947	0.660046
Agmat	0	0	0	0
Agmo	0	0.762265	0.554341	1.16033
Ago1	0.062537	1.21431	0	1.40731
Ago2	0.177959	1.47178	5.96718	3.27209
Ago3	1.18939	1.04723	1.11309	1.34257
Ago4	0.002836	0.225302	1.32429	0.239038
Agpat1	17.1557	10.1974	14.1071	7.02026
Agpat2	0.120003	24.9299	22.029	13.4312
Agpat3	11.7857	30.3224	21.9015	11.1795
Agpat4	0	0.889032	12.019	9.04689
Agpat5	4.16443	3.38098	6.71766	2.12707
Agps	0.28575	1.47426	0.095365	0.775781
Agr2	13.1705	212.412	40.1184	34.4206
Agr3	0	0	0.012695	0
Agrn	1.12573	2.91815	3.13989	2.72386
Agrp	0	0.5304	0	0.387584
Agt	0	59.3739	0.908456	0.125445
Agtpbp1	0	0.375678	1.15268	0.574588
Agtr1a	0	0.321625	1.44892	3.12942
Agtr1b	0	0	0	0.092264
Agtr2	0	0.481991	6.36303	2.5673
Agtrap	3.61314	15.4977	11.4036	8.81537
Agxt	0.022114	0	0	0
Agxt2	0	0.117881	0	0
Ahctf1	0.468461	2.6046	4.54068	2.46177
Ahcy	2.45617	5.82693	8.31834	6.65908
Ahcyl1	1.60089	6.11836	8.30034	7.217
Ahcyl2	1.79956	0.473309	2.25919	1.07521
Ahdc1	0.08363	0.883993	1.00221	1.39892
Ahi1	0	0.682102	4.96389	3.50855
Ahnak	0.282576	0.97437	8.4026	17.7273
Ahr	0.317115	1.05354	2.49685	2.1684
Ahrr	0	0	0	0.080947
Ahsa1	58.2526	70.7772	82.5034	70.5626
Ahsa2	1.62799	7.7307	9.91451	9.39436
Ahsg	0	0	0	0
AI115009	0	0	0	0.396946
AI182371	0	0	0	0.270811
AI197445	0.002355	0	0	0
AI314278	0	0	0	0.078688
AI413582	21.2418	26.1412	39.1622	34.595
AI427809	0	0.31937	0	0.193961
AI429214	0	1.25685	0	0.901786
AI450353	56.1944	5.01785	5.13746	5.20238
AI463170	2.41671	9.57032	3.19031	2.02062
AI467606	0	1.24907	0.007047	3.03917
AI504432	0	0	0	0.004686
AI506816	0	0.025231	0	0.04731
AI507597	3.69503	0.213622	0	0.662452
AI593442	0	0	0	0
AI597479	0	1.40524	0	1.97598
AI606473	0	0	0	0
AI646519	0	0	0	0
AI661453	0.002887	0.647758	0	0.400765
AI662270	0	0	0	0.222569
AI837181	12.9503	21.3188	9.64718	26.1055
AI839979	0	0.830804	0	0.833312
AI847159	0.014442	0	0	0
AI854703	0	0.103315	0	0
AI987944	0.077062	3.50753	0	3.08567
Aicda	0	0	0	0
Aida	2.85033	2.57379	1.99445	4.38102
Aif1	0	0.288207	3.29587	0.619963
Aif1l	0	2.3076	3.84858	2.69318
Aifm1	14.9072	16.1955	20.2931	11.8419
Aifm2	1.36085	0.268122	1.82559	2.17292
Aifm3	2.77408	0.861557	0	1.22968
Aig1	0	24.8336	41.3712	12.8368
Aim2	0	0	0	0.119682
Aimp1	6.17797	36.4573	49.0967	35.4683
Aimp2	4.80642	14.1769	11.0576	13.6214
Aip	13.1166	34.8544	19.5443	28.693
Aipl1	0	0	0	0
Aire	0	0	0	0.271128
Airn	0	1.39187	11.0232	1.41667
Ajap1	0	0.683638	0.120342	1.26054
Ajm1	0.01269	0.514623	0.021308	0.285295
Ajuba	6.01727	5.49444	1.52436	6.25382
Ak1	13.5799	7.34156	12.2731	14.259
Ak2	11.0294	17.7513	27.3363	17.8413
Ak3	9.27762	19.9686	12.6615	35.5737
Ak4	0.989776	1.07982	0	1.06759
Ak5	0.001532	0.182537	0.035738	0.463322
Ak6	13.9639	23.8115	4.68176	22.0743
Ak7	0	0.190957	0	0
Ak8	7.48103	6.74799	1.81317	3.03024
Ak9	0	0.870121	0.581243	0.858245
Akain1	0	0	0	0
Akap1	0.022961	5.84832	2.80487	2.72245
Akap10	0.048694	0.711826	4.46941	1.39182
Akap11	0.098866	4.04531	2.28072	2.91696
Akap12	0.031293	0.457956	10.9854	10.3014
Akap13	1.56129	4.53282	12.3857	8.6312
Akap14	0	0	0	0.044399
Akap17b	0	0.493147	0.008111	0.972962
Akap2	0	0.993654	32.2251	32.5971
Akap3	0	0	0	0
Akap4	0	0	0	0
Akap5	0.915424	0.05522	0.129087	0.186053
Akap6	0	0	0	0.01329
Akap7	0.574102	0.649385	0.428553	1.29917
Akap8	10.3318	9.992	7.74861	11.7351
Akap8l	6.55337	34.4627	43.2902	33.8065
Akap9	0.789142	6.76347	4.17362	5.5779
Akip1	12.2162	24.5368	44.6514	16.5889
Akirin1	1.82972	8.55099	11.8674	16.8873
Akirin2	0.821416	1.47957	0.985861	1.82774
Akna	0	0.076778	1.21705	0.976125
Aknad1	0	0	0	0.045537
Akp3	0	0	0	0
Akr1a1	385.79	790.022	450.595	632.487
Akr1b10	0	17.0201	11.6289	12.8713
Akr1b3	0	13.7335	15.0117	16.4641
Akr1b7	0	22.4028	21.0237	466.392
Akr1b8	0	1.3388	2.02853	11.8669
Akr1c12	0	16.7778	6.02108	17.8951
Akr1c13	4.37647	38.8617	84.8791	35.0706
Akr1c14	0	0	0.015734	0.098287
Akr1c18	0	0	0	0.097504
Akr1c19	13.9266	134.811	222.02	111.053
Akr1c20	0	0	0	0
Akr1c21	0	0	0	0.220255
Akr1c6	0	0	0	0
Akr1cl	0	0.196409	0	0.579898
Akr1d1	0	0	0	0
Akr1e1	2.68493	17.4097	0.52379	11.3859
Akr7a5	15.9579	115.632	40.9082	50.947
Akt1	0.031945	7.5989	4.29578	7.82888
Akt1s1	2.80657	8.50785	6.59954	10.029
Akt2	4.39684	3.4589	12.6127	3.24166
Akt3	0.072927	1.19178	0.831568	3.15155
Aktip	26.8907	44.9735	43.8144	34.6296
Alad	9.16544	50.2794	43.7846	25.5743
Alas1	0.030397	8.2312	56.6904	34.126
Alas2	0	2.25327	0.015236	1.23317
Alb	0	0.055522	0	0.314343
Albfm1	0	0.082359	0	0.021012
Alcam	0	10.4884	15.5787	7.99589
Aldh16a1	0.631164	5.45155	0.333493	5.23351
Aldh18a1	0	5.29587	2.07083	5.2514
Aldh1a1	69.5803	522.739	407.693	527.304
Aldh1a2	0.652269	4.41697	15.1182	13.0105
Aldh1a3	0	0	0	0.715389
Aldh1a7	65.7026	92.2207	56.495	65.3702
Aldh1b1	0	0	0	0.480343
Aldh1l1	0	0.663254	5.3104	0.194493
Aldh1l2	0	0.34037	0.86865	0.455879
Aldh2	23.3112	66.0636	53.2371	102.511
Aldh3a1	0	13.4576	13.4006	19.9058
Aldh3a2	1.67047	3.49001	3.8407	5.19027
Aldh3b1	0	0.666558	6.66961	2.57445
Aldh3b2	0	3.13112	0.012028	2.18424
Aldh3b3	0	0.051706	0	0
Aldh4a1	8.65911	19.9974	9.40617	17.3991
Aldh5a1	0.098709	2.82984	5.73054	1.714
Aldh6a1	23.6126	41.5236	11.6917	34.2789
Aldh7a1	23.3957	24.6179	23.7204	26.4324
Aldh8a1	0	0.459163	2.90678	0.197625
Aldh9a1	1.0691	6.82123	0.109364	10.8467
Aldoa	34.4182	272.663	221.91	268.634
Aldoart1	0.028322	0.233862	0.177842	0.11711
Aldoart2	0	0	0.129039	0.13243
Aldob	0.005891	0.135364	0	0.041036
Aldoc	21.8793	13.4498	7.37923	15.9053
Alg1	3.93183	11.7037	6.57919	18.3581
Alg10b	0	0.301097	0	0.73322
Alg11	163.81	5.01285	1.58781	5.45566
Alg12	1.01149	2.8867	0	8.68114
Alg13	0.454791	0.620131	2.43293	0.900628
Alg14	0	5.42833	5.64647	9.02268
Alg2	0.707781	9.05274	3.58532	7.28837
Alg3	5.90027	11.1385	31.1625	7.91518
Alg5	23.2019	40.7009	45.135	33.1432
Alg6	3.07695	2.9197	0.208672	2.07266
Alg8	1.91233	4.58429	0	5.2436
Alg9	2.34838	4.24153	4.92786	6.57317
Alk	0	0	0.003865	0.044173
Alkal1	0	0	0	0
Alkal2	0	1.28844	0	7.92355
Alkbh1	1.46463	14.76	12.4939	10.2182
Alkbh2	0.516503	13.5389	1.77167	5.26433
Alkbh3	14.2516	12.6605	12.1173	12.3368
Alkbh3os1	0.074991	0.033341	0	0
Alkbh4	0	3.69761	1.90331	2.99596
Alkbh5	23.9967	8.75155	4.17067	7.96307
Alkbh6	14.6848	27.1992	15.6801	29.1839
Alkbh7	8.79688	24.9516	5.94569	20.8332
Alkbh8	0	1.65292	0.065067	2.86243
Allc	0	0	0	0
Alms1	0	0.099089	0	0.186539
Alox12	0.612952	5.41902	1.45049	8.27655
Alox12b	0	0	0	0
Alox12e	0.009666	0.068332	0	1.41612
Alox15	0	0.544383	0	2.35889
Alox5	0	3.6209	0.005517	1.00341
Alox5ap	0	0.447775	0	2.24662
Alox8	0	0	0.002859	0
Aloxe3	1.43173	1.14757	2.16008	1.99733
Alpi	0	0	0.004449	0
Alpk1	1.48009	0.324874	0	1.79235
Alpk2	0	0.063153	0.001578	0.015906
Alpk3	0	0	0	0.070364
Alpl	2.40525	128.931	31.1568	50.3457
Alppl2	0	6.29917	22.4109	2.21569
Als2	0.030465	0.958065	1.16773	1.45774
Als2cl	0.013067	0.667219	0.275768	0.323874
Alx1	0	0	0	0
Alx3	0.008034	0	0	0.221379
Alx4	0	0	0	0.028711
Alyref	5.36051	5.38385	4.90087	3.32488
Alyref2	5.94653	4.75853	0.998037	4.93747
Amacr	1.57479	2.76246	12.1206	4.65486
Ambn	0	0	0	0
Ambp	0	0.04079	0	0
Ambra1	2.69668	2.79542	0.551684	3.4365
Amd1	0.799281	2.40989	1.36885	4.66957
Amd2	0.801531	2.40167	1.36783	4.67611
Amdhd1	0	2.98088	0	0
Amdhd2	2.65619	15.2577	8.68422	9.35827
Amelx	0	0	0	0.245327
Amer1	0	1.34614	3.56144	1.50713
Amer2	0.018237	0.025308	0	0.045919
Amer3	0	0	0	0
Amfr	136.716	7.55043	1.31134	12.116
Amh	0.007752	0	0.713262	0
Amhr2	0	0.053138	3.77013	0.446443
Amigo1	0	0.60466	0.284026	0.722328
Amigo2	0	2.61063	2.9143	3.62229
Amigo3	0.076354	4.63204	5.22135	3.76142
Ammecr1	0.328335	0.594974	0.987275	1.36888
Ammecr1l	0.113091	4.16456	5.90754	6.61114
Amn	0	0.256228	0.014678	0.226365
Amn1	5.39107	8.15623	15.5419	11.0151
Amot	2.18328	7.33893	0.846754	7.15649
Amotl1	0	2.27589	2.55415	5.36261
Amotl2	0.341643	3.74778	0.937731	6.68043
Ampd1	0	0	0.687651	0
Ampd2	0.590588	0.849829	5.68382	3.38256
Ampd3	0	0.122625	1.57775	2.42033
Amph	0	0.175944	0	0
Amt	210.614	6.82198	15.8077	7.91947
Amtn	0	0	0	0
Amy1	0	10.0714	42.8095	13.7525
Amy2a2	0	0	0	0
Amy2a3	0	0	0	0
Amy2a4	0	0	0	0
Amy2a5	0	0	0	0
Amy2b	0	0	0	0
Amz1	0	0.100362	0	0.041122
Amz2	5.17549	10.4059	4.08655	4.92172
Anapc1	0.182657	2.25552	2.20797	2.88292
Anapc10	3.0301	6.5247	8.16	8.34314
Anapc11	2.83172	18.5195	16.0099	18.3346
Anapc13	467.24	745.493	897.095	406.024
Anapc15	0.246807	12.1117	9.80172	1.21446
Anapc16	5.07871	18.876	17.3062	17.6783
Anapc2	18.4809	25.3101	29.539	24.2368
Anapc4	0.800049	10.0905	8.60589	8.25307
Anapc5	7.9085	38.0202	65.4573	67.3675
Anapc7	4.25706	24.2908	9.78594	30.5937
Ang	3.39153	2.93629	3.25956	8.91657
Ang2	0	0	0	0
Ang3	0	0	0	0
Ang4	0	0	0	0
Ang5	0	0	0	0
Ang6	0	0	0	0
Angel1	0	0.80348	0	0.23449
Angel2	52.3421	3.03482	4.63957	7.39686
Angpt1	0	0	0	3.73311
Angpt2	0	0.670884	0	0.430102
Angpt4	0	0.186305	0	2.26264
Angptl1	0	0.075818	0	0.532097
Angptl2	0	1.02789	1.5861	3.41574
Angptl3	0	0	0	0
Angptl4	0	1.64882	31.6977	50.0536
Angptl6	0	2.80868	0	2.44966
Angptl7	0	0	0	0
Angptl8	0	2.97446	0	0.427985
Ank	0	8.53163	9.03781	3.49591
Ank1	0.025964	0.006929	0	0.141956
Ank2	0.021957	0.159587	1.10363	1.04575
Ank3	0.225095	3.16683	3.69394	2.69016
Ankar	0	0	0	0
Ankdd1a	0	0	0.108097	0.056016
Ankdd1b	0	0	0.808913	0.341736
Ankef1	0	0	0	0.261773
Ankfn1	0	0.037464	0.033312	0.028111
Ankfy1	0.064613	2.19261	2.40123	1.95678
Ankhd1	1.85205	3.45506	7.1404	4.4121
Ankib1	0	1.54711	0.05305	1.6127
Ankk1	0	0	0	0.131784
Ankle1	0	0.584605	0.004125	1.44213
Ankle2	1.59615	2.21457	0.625316	2.79634
Ankmy1	0	0.067095	0	0.152567
Ankmy2	8.02245	8.28379	0	11.4423
Ankra2	6.0289	6.75164	0.036125	4.93696
Ankrd1	0	0	7.1017	0
Ankrd10	1.98605	4.37321	3.38252	16.7638
Ankrd11	0.688905	3.09599	7.41546	4.98607
Ankrd12	0	1.30642	0.913993	3.39985
Ankrd13a	3.94881	1.30312	8.29322	5.6111
Ankrd13b	0	0.105696	0	0.150442
Ankrd13c	42.9142	8.66289	7.33828	8.96898
Ankrd13d	0.040719	6.25695	5.72097	4.36454
Ankrd16	0	2.98486	12.4121	3.65171
Ankrd17	2.83228	5.08642	5.83656	7.29413
Ankrd2	1.87609	0	0	0.534905
Ankrd22	5.55309	3.16737	0	2.77346
Ankrd23	94.2641	3.06395	0.423789	2.94809
Ankrd24	0.895369	7.48689	6.38793	2.5692
Ankrd26	0	0.895495	0.533171	0.981483
Ankrd27	8.2147	3.31877	0.009866	2.40164
Ankrd28	0.508494	4.43901	5.71223	2.55435
Ankrd29	13.3775	10.4393	3.36079	8.14899
Ankrd31	0	0	0	0.020473
Ankrd33	0	0	0	0
Ankrd33b	0	0	1.41703	0.173424
Ankrd34a	0	0	0	0
Ankrd34b	0.123706	0.349466	0	0.889746
Ankrd34c	0.01014	0	0	0
Ankrd35	0	0.027291	0	0.28409
Ankrd36	0	0	0.002833	0.014974
Ankrd37	0	5.73312	2.11273	1.08846
Ankrd39	3.01492	3.90389	0.366681	4.72719
Ankrd40	2.60875	6.73243	0.114109	8.03071
Ankrd42	0	2.47333	1.37305	0.657773
Ankrd44	0	0.348702	0.646335	1.32806
Ankrd45	1.40689	0.050606	0	0.0625
Ankrd46	0	8.86752	5.2903	10.419
Ankrd49	0	4.55369	0	1.85076
Ankrd50	0	0.857245	0	0.96494
Ankrd52	0.176716	0.849888	0.003143	0.324743
Ankrd53	0.221286	0.14876	0	0.093479
Ankrd54	9.19618	19.5696	28.0988	16.1887
Ankrd55	0	0	0	0.349982
Ankrd6	0.048635	0.08852	0	0.12141
Ankrd60	0	0	0	0
Ankrd61	0	0.466417	0	0.063765
Ankrd63	0.006521	0	0	0
Ankrd65	0.009483	0.286199	0	0.210977
Ankrd66	0	7.46945	0.8689	1.03372
Ankrd7	0	0	0	0.013633
Ankrd9	4.1296	23.5221	14.724	18.7911
Anks1	0.311408	2.08149	4.46985	2.42916
Anks1b	0.000189	0.365354	0.145521	0.03522
Anks3	6.02772	16.1943	8.56875	11.7119
Anks4b	0	1.46747	0	0.859048
Anks6	0.121136	1.19553	0	0.914665
Ankub1	0	0	0	0
Ankzf1	0.7215	10.0184	4.8805	7.07318
Anln	0	0	0.905438	0.418733
Ano1	0.958811	3.47092	5.93441	16.5179
Ano10	1.64101	13.8807	6.20561	10.2931
Ano2	0	0	0	0.094883
Ano3	0	0.505118	0.715872	0.419188
Ano4	0	0	0.002463	0.025382
Ano5	0.020443	0.155814	0	0.325657
Ano6	19.2509	7.50757	9.41328	11.1223
Ano7	0.010188	0.29851	0.800916	0
Ano8	0	0.171946	2.27337	0.031982
Ano9	0	0.390957	0	0.309433
Anp32a	9.67105	34.2602	19.5349	31.383
Anp32b	22.2479	43.0919	35.3876	48.2841
Anp32e	4.54243	16.256	21.4226	22.0367
Anpep	0	0.759282	0.029573	1.85121
Antxr1	0	0.037165	0.655336	7.09788
Antxr2	0	0.149362	1.88434	10.7909
Antxrl	0	0	0	0.019858
Anxa1	27.8643	80.5336	223.469	130.784
Anxa10	0	0	0	0
Anxa11	0.327047	3.24751	0	3.6298
Anxa13	0	12.5979	31.7509	10.4846
Anxa2	87.4442	443.891	520.75	515.39
Anxa3	6.24045	57.01	14.6403	24.7197
Anxa4	14.0668	30.5354	13.7975	28.7452
Anxa5	61.6288	200.182	244.147	288.338
Anxa6	7.6675	28.4294	43.8372	43.3646
Anxa7	0.127686	16.0117	35.5174	57.8604
Anxa8	0	1.53432	0	0.569466
Anxa9	9.59187	4.80985	5.70752	7.61128
Aoah	0.004968	0.422238	0	0.083959
Aoc1	0	0.403165	0.003978	0.066079
Aoc2	0.022926	0.250462	2.2988	0.506651
Aoc3	0.003005	0.145272	2.83384	0.728382
Aopep	0.742008	14.6837	4.56367	16.2719
Aox1	0	1.04542	0	2.38555
Aox2	0	0	0.411653	0.035697
Aox3	0	0	0	0.983539
Aox4	0	0.017076	0.00481	0.006859
Ap1ar	4.27965	4.50024	7.03916	4.35778
Ap1b1	0.727236	1.81039	1.41507	1.37025
Ap1g1	3.9657	6.27782	13.3333	5.6543
Ap1g2	0	3.14209	0.245998	1.87561
Ap1m1	3.58378	4.42261	9.9162	11.4984
Ap1m2	9.8336	36.0834	22.365	31.7069
Ap1s1	2.66575	26.2423	0.866539	16.1474
Ap1s2	40.0552	192.769	21.5285	99.6523
Ap1s3	2.29178	2.17942	9.1808	3.55399
Ap2a1	3.52067	7.88244	5.26035	8.35968
Ap2a2	30.2945	3.62223	5.10729	8.53691
Ap2b1	6.20803	6.0725	1.68399	7.79647
Ap2m1	20.3159	17.3611	25.2852	20.9168
Ap2s1	22.9481	149.104	49.9064	64.446
Ap3b1	5.75467	3.68957	0.970895	6.70044
Ap3b2	0.579227	31.7252	10.7247	3.20391
Ap3d1	4.66036	7.40658	8.22793	9.96851
Ap3m1	8.50477	3.21413	2.3393	3.49076
Ap3m2	1.00428	4.55597	2.2737	2.08221
Ap3s1	9.47081	6.17206	0.038631	9.02768
Ap3s2	1.24759	4.48642	1.90508	1.87941
Ap4b1	3.33713	9.88816	2.91899	8.29154
Ap4e1	0.08868	1.00772	2.68815	1.23645
Ap4m1	0	1.62844	0	3.48114
Ap4s1	10.3045	18.3204	6.86138	23.6303
Ap5b1	0.811779	1.14079	0.257771	0.79687
Ap5m1	1.40296	0.712043	0.456618	0.960897
Ap5s1	8.4135	11.6643	9.91863	8.37126
Ap5z1	4.04325	2.97962	5.03911	3.14448
Apaf1	0	0.441371	0	0.873392
Apba1	0.324642	0.092953	0.663602	0.431391
Apba2	0.003783	0.050362	0.161183	0.117333
Apba3	1.66692	2.07434	0.771256	4.78098
Apbb1	0.077933	1.43678	3.80416	4.00796
Apbb1ip	0	0	0	0.386751
Apbb2	0.112326	1.02102	1.35903	2.891
Apbb3	4.30018	7.49368	7.32826	3.77298
Apc	0	0.487908	0.270837	0.476511
Apc2	0.002994	0.089277	0.033789	0.036543
Apcdd1	0	0.883432	39.9018	37.5668
Apcs	0	0	0	0
Apeh	1.42805	16.1752	7.15477	13.2573
Apela	0	0	0	0
Apex1	50.4277	127.875	71.1062	96.6985
Apex2	4.022	12.2474	7.20746	6.61678
Aph1a	1.32745	5.68236	5.17847	5.63975
Aph1b	0.1675	0.837411	0	1.62906
Aph1c	0.079482	0.490526	0.903939	0.517333
Api5	0	6.30369	1.779	12.9337
Apip	16.7711	20.3387	20.5148	31.3841
Aplf	0.174266	1.27433	3.3859	0.685205
Apln	0	0	0	0.009797
Aplnr	0	0	0	0.043736
Aplp1	0	0.930568	5.30798	2.91277
Aplp2	5.18887	17.8093	16.0527	61.7983
Apmap	8.49292	17.3908	8.58326	15.959
Apoa1	0.012032	0	0.516689	0
Apoa2	0	0.275678	0	0.825166
Apoa4	0	0	0	0
Apoa5	0	0	0	0
Apob	0.070274	0.006899	0	0.022881
Apobec1	0	1.04957	0.024787	4.33922
Apobec2	0	0.154567	0	0
Apobec3	25.1874	17.6642	11.0586	23.0716
Apobec4	0	0	0	0
Apobr	0.951294	8.78697	1.08302	7.32002
Apoc1	11.4227	59.4662	22.2404	32.6016
Apoc2	0	0	0	0
Apoc3	0	0	0	0
Apoc4	0	3.16407	10.6277	0.379285
Apod	22.1594	15.3619	225.932	528.467
Apoe	17.5428	1338.99	1218.87	1893.06
Apof	0.0982	1.9512	1.36228	3.24254
Apoh	0	0	0	0.855666
Apol10a	0	0	0	0
Apol10b	0	0.462822	0	0.291059
Apol11a	0	0	0	0
Apol11b	0	0	0	0
Apol6	0.01829	1.52096	0.72973	0.561665
Apol7a	0	0	0	0
Apol7b	0	0	0	0
Apol7c	0	0	0	0
Apol7d	0	0	0	0
Apol7e	0	0	0.019608	0
Apol8	0	0.176682	1.34893	1.45274
Apol9a	0	0.110296	0	0.573926
Apol9b	0	0.904916	0.018904	0.834762
Apold1	0	0.249539	0	3.96139
Apom	1.73062	0.473505	0	0.263535
Apon	0	0	0	0.173611
Apoo	1.60893	6.23237	5.74144	7.02125
Apool	9.81446	10.3475	12.9291	7.54101
Apopt1	10.0591	17.7518	6.94641	20.1166
App	1.5424	21.028	30.5311	50.8731
Appbp2	0.487708	12.1226	28.1296	18.9114
Appbp2os	0	3.23575	0	2.5472
Appl1	0.181784	1.69961	0.245995	3.83687
Appl2	2.43633	8.96342	0.122856	9.57688
Aprt	0	4.80821	20.2151	39.1435
Aptx	1.40586	5.5156	2.32469	4.50467
Aqp1	0	0.255457	0.103215	13.7174
Aqp11	4.67102	6.40831	8.37729	10.6364
Aqp12	0	0	0	0
Aqp2	0	0	0	0.275206
Aqp3	0	0.305697	0	0.535098
Aqp4	0	0.015308	0.362822	0
Aqp5	0.029807	0.704487	2.06061	0.229267
Aqp6	0	5.99119	0	0.051728
Aqp7	0	0	0	0.018656
Aqp8	0	0	0	0.317969
Aqp9	13.3042	33.6563	35.7827	17.3105
Aqr	0	2.41025	2.13104	1.5803
Ar	16.0247	5.83333	7.08029	9.65353
Araf	72.2893	57.5915	36.1004	51.6229
Arap1	0.618972	1.71158	2.23049	2.5609
Arap2	0.832678	0.388595	0.990262	0.605419
Arap3	0	0.140299	0	0.222933
Arc	3.65432	6.28986	1.69939	9.95073
Arcn1	8.92383	10.4214	4.18434	16.2945
Areg	0	1.46137	2.10847	4.50096
Arel1	0.79305	5.05957	2.61532	6.40607
Arf1	26.3411	143.483	129.756	149.231
Arf2	0.935262	6.54427	23.4502	7.36492
Arf3	12.3646	11.1741	9.12468	14.3024
Arf4	269.479	105.897	170.143	193.163
Arf5	35.9408	85.6807	65.1659	69.0563
Arf6	38.1694	17.6833	3.2428	19.7352
Arfgap1	10.5762	46.4922	26.9886	26.0334
Arfgap2	0.444812	17.4767	15.0796	12.2306
Arfgap3	9.18716	15.6839	17.7801	22.9432
Arfgef1	1.72359	5.26086	2.65887	3.79712
Arfgef2	0.742314	2.10187	1.60467	2.02927
Arfgef3	5.08286	1.85424	2.27021	4.84525
Arfip1	2.25469	9.70448	5.621	16.1774
Arfip2	0.800908	20.1693	17.2915	19.651
Arfrp1	2.20214	14.0842	23.2745	14.7624
Arg1	0	0.06498	0	0
Arg2	0	19.6129	5.00108	13.822
Arglu1	31.2388	11.7815	16.9429	13.0523
Arhgap1	3.6799	4.06954	4.20071	12.4256
Arhgap10	0	0.532811	13.9303	8.31704
Arhgap11a	0.039229	1.13237	0	0.992287
Arhgap12	0.114973	2.65779	3.13064	2.43364
Arhgap15	0	0	0.001133	0.168748
Arhgap15os	0	0	0	0
Arhgap17	6.9755	4.67915	8.32941	6.56508
Arhgap18	0.143192	3.61689	3.17054	3.64303
Arhgap19	0.050881	0.140045	0.753067	0.241346
Arhgap20	0	0.040598	0	0.118877
Arhgap20os	0	0	0	0
Arhgap21	2.06713	2.48106	3.51127	3.36317
Arhgap22	2.12214	0.68912	0	1.00498
Arhgap23	0.111972	0.434165	1.84073	1.94935
Arhgap24	0.001029	0.131499	0.08726	0.204788
Arhgap25	0	0.043297	0	0.757199
Arhgap26	35.1213	0.463121	4.84136	1.49503
Arhgap27	0.605733	3.8351	1.48026	1.16483
Arhgap27os3	0.00532	0	0	0.042808
Arhgap28	0	0.524498	0.838529	0.824556
Arhgap29	0.083284	0.258436	2.90141	1.56033
Arhgap30	0	0.209787	0.006951	0.026416
Arhgap31	1.43548	1.68413	1.57596	4.56267
Arhgap32	0.847868	0.253984	0.174757	0.212341
Arhgap33	1.08296	0.332866	0.422469	0.322772
Arhgap33os	0	0	0	0
Arhgap35	2.58604	2.35216	1.98982	2.21087
Arhgap36	0	0	0	0
Arhgap39	7.74079	3.15578	0.479125	3.52059
Arhgap4	0	1.47278	0.076075	0.435631
Arhgap40	3.7073	3.1508	2.87863	1.58608
Arhgap42	0	0.601124	1.26015	1.49035
Arhgap44	31.8926	1.52676	1.26835	4.72806
Arhgap45	0.01056	0	1.78864	0.318537
Arhgap5	0	2.51209	0.072235	2.82087
Arhgap6	0.20557	0.01931	0.177692	0.290533
Arhgap8	15.1909	12.4009	1.90397	14.2162
Arhgap9	3.50114	1.72913	1.68372	2.02288
Arhgdia	59.9482	129.842	70.3966	129.913
Arhgdib	0.387669	3.43557	21.8241	20.6368
Arhgdig	0	0.869198	0	0
Arhgef1	1.90698	1.91043	3.31221	2.64678
Arhgef10	0.962938	1.10315	0	1.78203
Arhgef10l	0.020674	2.20741	0.101204	2.81086
Arhgef11	0.22353	0.38638	0.252502	0.674823
Arhgef12	2.51247	3.45407	8.25077	5.52648
Arhgef15	0	0	0	0.042884
Arhgef16	1.10211	21.8631	8.53564	6.29884
Arhgef17	0.614303	0.664092	3.50949	2.19019
Arhgef18	0.046455	0.36188	0.230046	0.216482
Arhgef19	0	0.881287	0	1.44017
Arhgef2	0.124037	0.488285	0.752505	1.42566
Arhgef25	0	3.31197	10.5866	21.7628
Arhgef26	0	0.790054	2.07179	1.86361
Arhgef28	0.732295	9.45766	7.34992	4.44696
Arhgef3	2.01879	0.158044	0.907136	0.998141
Arhgef33	0	1.4546	0.501512	0.584556
Arhgef37	0	1.10149	0	0.186773
Arhgef38	6.088	2.30423	0.509233	0.679795
Arhgef39	0	0.079915	1.4128	2.10704
Arhgef4	0.178669	3.68456	1.03207	1.43474
Arhgef40	2.00836	13.6873	7.40441	8.73718
Arhgef5	0.212044	3.50366	0.579358	3.50088
Arhgef6	0	0	0	0.126135
Arhgef7	2.11919	2.44044	0.405286	1.46655
Arhgef9	3.18329	0.100181	0.133935	0.497366
Arid1a	3.18937	4.56564	4.18644	4.64844
Arid1b	2.46621	2.1226	0.964869	3.06348
Arid2	0.673384	2.25148	2.1487	2.24899
Arid3a	0.001526	0.201311	0.394254	0.247826
Arid3b	0.541101	1.07889	0	0.662163
Arid3c	0	0	0	0
Arid4a	4.44687	3.81722	7.4676	6.10353
Arid4b	0.76102	6.35686	13.8599	9.20631
Arid5a	0.455946	4.88032	12.9226	19.5177
Arid5b	2.83985	3.27578	6.76446	9.62594
Arih1	38.3285	4.66489	12.9962	14.3293
Arih2	0.484416	10.4426	19.6551	11.8698
Arl1	63.6075	51.3729	44.5227	77.5796
Arl10	0	2.47268	2.28573	4.35831
Arl11	0	0	0	0
Arl13a	0	0.103836	0	0.026098
Arl13b	0.027238	2.29618	14.2529	12.1549
Arl14	0	0	0	0
Arl14ep	12.4878	2.20014	1.23651	5.12139
Arl14epl	0	0	0	0
Arl15	3.03593	3.63979	6.38291	4.91945
Arl16	3.68121	10.5323	2.12718	4.94819
Arl2	49.8163	66.5303	71.4084	59.3356
Arl2bp	7.56875	8.24855	8.85978	12.5893
Arl3	12.5788	65.0717	61.9433	50.9607
Arl4a	0	9.65325	19.323	15.0238
Arl4c	12.4111	46.9803	23.7362	12.5312
Arl4d	4.32295	19.9849	14.8288	41.8077
Arl5a	0	0.598474	0.880306	2.37731
Arl5b	3.1327	2.49642	6.82179	6.00875
Arl5c	0	0.070942	0	4.39474
Arl6	0.391997	6.08865	0	7.93976
Arl6ip1	37.4626	55.0876	62.0527	83.919
Arl6ip4	11.7158	60.5116	38.801	32.3946
Arl6ip5	10.8343	26.984	28.883	44.9219
Arl6ip6	6.7482	8.44267	5.06447	7.81774
Arl8a	13.2274	3.36391	2.40314	6.09226
Arl8b	203.325	38.021	27.2045	59.6238
Arl9	0	0.275479	0	0.298893
Armc1	0.058499	8.74953	1.53974	8.50406
Armc10	5.01605	5.35685	12.4223	8.40788
Armc12	0	0	0.070695	0
Armc2	0.005158	0.354346	0.027782	0.064749
Armc3	0	0	0	0.030149
Armc4	0	0	0	0.135621
Armc5	0.777227	4.22384	0.07132	2.9785
Armc6	3.48727	2.39656	0	2.39691
Armc7	0	1.12166	0.126771	1.07467
Armc8	0	2.67802	3.21653	2.64403
Armc9	0.031145	1.70216	6.25547	1.92969
Armcx1	18.1766	22.9541	21.4809	27.7741
Armcx2	11.4172	5.92795	1.92857	18.1828
Armcx3	0.663474	1.53164	5.75247	3.60555
Armcx4	0.163736	0.829552	0.001039	0.812847
Armcx5	1.95184	3.20907	4.98013	2.97604
Armcx6	5.77834	19.7075	9.06176	24.0947
Armh1	0	0.046216	0.006226	0.380959
Armh2	0	0	0	0
Armh3	0.786322	1.4136	1.17504	2.27185
Armh4	0	1.77298	18.7493	33.3504
Armt1	0.126896	3.42382	6.65674	2.61708
Arnt	1.26615	1.16513	3.92365	5.36208
Arnt2	0	4.10717	0.020886	1.09166
Arntl	3.19869	2.16393	2.16457	7.08691
Arntl2	0.185315	0	0	0.167757
Arpc1a	19.1277	47.4793	34.7653	67.7133
Arpc1b	72.1933	132.838	132.2	195.122
Arpc2	190.816	162.975	150.234	215.651
Arpc3	14.1983	106.215	67.6606	133.784
Arpc4	2.09851	47.8437	36.5366	39.6049
Arpc5	76.1439	70.1446	33.116	68.3962
Arpc5l	139.377	111.445	20.9607	95.854
Arpin	5.25809	5.22274	0.305147	9.56683
Arpp19	38.737	105.408	97.9423	46.1884
Arpp21	0	0.005157	0	0.028913
Arr3	0	0.076054	0	0.081246
Arrb1	0	0.524749	3.83042	2.53488
Arrb2	24.1464	5.0042	0.522983	7.8894
Arrdc1	2.94513	26.2088	8.33982	19.2185
Arrdc2	30.8255	75.9209	12.8587	41.1611
Arrdc3	0.809599	6.73595	2.58926	8.1119
Arrdc4	0.950829	20.1968	58.3565	48.967
Arrdc5	0	0	0	0.316748
Arsa	0.231181	2.08204	2.26909	2.04836
Arsb	0.412255	1.93686	7.62109	7.22673
Arsg	0.021026	0.150606	0.030761	0.213776
Arsi	0	0	0	0.549854
Arsj	0	0	0.517873	0.153571
Arsk	0.132393	1.83384	0.680033	2.15285
Art1	0	0	0	0
Art2a	0	0	0	0
Art2b	0	0	0	0
Art3	0	1.07421	0.660869	19.0788
Art4	0	7.16294	0	1.13469
Art5	0	0.107686	0.025477	0.100417
Artn	0	2.23842	3.28035	3.10331
Arv1	0.347274	0.804554	0.007926	0.853789
Arvcf	0.16746	3.41688	0.905678	0.65164
Arx	0	0	0	0
Arxes1	0	2.93911	1.94646	2.17968
Arxes2	0	9.69834	1.5197	8.74064
As3mt	6.42785	7.71028	0	5.04418
Asah1	12.1111	26.0583	11.6799	35.4848
Asah2	0.040026	0.332519	0.067975	0.899143
Asap1	0.363092	0.752069	1.51725	3.40381
Asap2	5.15325	0.944466	0.129435	1.70691
Asap3	0	0.344962	0.810766	3.00812
Asb1	0.018396	0.520234	5.057	0.4993
Asb10	0	0.419289	0	0.148891
Asb11	0.22227	61.5005	25.2906	16.7895
Asb12	0	0	0	0
Asb13	0.51958	7.80863	9.14712	4.91763
Asb14	0.00719	0	0	0.171128
Asb15	0	0	0	0.005707
Asb16	0	1.12818	0	0.804677
Asb17	0	0	0	0
Asb17os	0	0	0	0
Asb18	0.639537	1.30601	0	1.42435
Asb2	0	0.346347	0.688584	2.40897
Asb3	1.45521	3.13627	5.77101	3.36826
Asb4	0	0	0	0.081793
Asb5	0	0.024895	0	0.054903
Asb6	0.732013	14.8303	6.31539	5.79865
Asb7	0.983796	1.85337	0.092348	0.515862
Asb8	0	6.81566	0	2.60379
Asb9	0	0	0	0
Ascc1	0.131819	30.4243	2.2679	19.7993
Ascc2	2.49622	5.27567	2.19113	3.74857
Ascc3	0.483514	1.69389	3.90972	3.22571
Ascl1	0	0	0	0
Ascl2	0.008193	1.57091	0.007739	0.433124
Ascl3	0	0.386919	0	0
Ascl4	471.198	9.52574	10.3729	18.3722
Ascl5	0	0	0	0
Asdurf	0.065704	17.3617	3.38836	6.86527
Asf1a	8.15165	16.2019	5.33615	12.9957
Asf1b	0	2.16083	0.039012	0.694571
Asgr1	0	0	0	0.188916
Asgr2	0	0	0	0
Ash1l	0.151074	2.17063	5.45962	3.26976
Ash2l	0.907937	8.13472	0.998103	6.21513
Asic1	0.129537	0.138631	0	0.055794
Asic2	0	0	0.191702	0.571362
Asic3	0	0.165371	0	0.036788
Asic4	0	0	0	0
Asic5	0	0	0	0
Asl	7.21701	55.5472	33.8002	43.7628
Asmt	0	0	0	0
Asna1	70.796	36.3576	45.0344	28.828
Asns	1.45431	9.61085	11.1226	8.4781
Asnsd1	0.19851	13.4618	8.88037	11.05
Aspa	0	0.072053	0	3.38793
Aspdh	0	0	0	0
Aspg	0	30.3042	16.3333	8.00743
Asph	0.226743	12.4672	1.64822	13.3735
Asphd1	0	0	0	0
Asphd2	0	0	0	0.034814
Aspm	0	0.016087	0.00137	0.223166
Aspn	0	0	0	0.285928
Asprv1	0	1.37433	0	0
Aspscr1	6.75069	32.9052	18.5824	23.5515
Asrgl1	3.53337	7.24646	42.5825	27.2211
Ass1	21.5195	7.99843	11.3282	29.5822
Aste1	1.32761	1.51421	2.30735	2.43925
Astl	0	0	0	0
Astn1	0	0.049055	0	0.042031
Astn2	0	0.424844	0	0.370721
Astx5	0	0	0	0
Astx6	0	0	0	0
Asxl1	1.81949	1.89407	0.918197	2.93724
Asxl2	3.10631	1.3453	0.102553	1.5466
Asxl3	0	0	0	0
Asz1	0	0	0.042425	0.069987
Atad1	0.47003	6.35532	0.952464	8.99767
Atad2	0.75608	0.376092	1.3979	1.48286
Atad2b	0.017825	1.31944	0	1.1322
Atad3a	5.68757	15.2769	23.0185	11.7788
Atad3aos	20.7191	1.82347	0	0.588281
Atad5	0.001816	0.29391	1.56954	0.347428
Atat1	0.436958	5.05716	12.9764	3.38478
Atcay	0	0.167926	0.345719	0
Atcayos	0	0.592017	10.9167	2.73172
Ate1	0.831912	1.84824	5.28531	4.55374
Atf1	11.3207	4.12094	2.59141	8.14088
Atf2	0.656002	2.72137	5.10788	2.58926
Atf3	33.8668	473.924	369.536	482.939
Atf4	47.3796	216.335	140.456	285.529
Atf5	52.9274	26.6427	16.9519	40.4378
Atf6	0	3.12902	1.31637	4.40293
Atf6b	18.9864	18.4873	9.29238	14.728
Atf7	1.28958	1.13577	2.28127	1.81537
Atf7ip	0.064191	2.62566	0.162832	3.78651
Atf7ip2	0	0	0	0.041838
Atg10	9.96689	12.9509	7.67652	14.4187
Atg101	14.3513	48.0574	50.1055	30.7212
Atg12	11.3854	18.2867	37.1022	25.5715
Atg13	9.21434	10.7161	8.1507	8.80574
Atg14	79.5158	3.12342	8.69562	1.68347
Atg16l1	4.21101	9.93895	0.087948	7.2582
Atg16l2	4.93084	2.76339	0.174529	5.17031
Atg2a	0.014168	2.61019	3.39884	1.89877
Atg2b	2.40191	2.01518	0.833531	2.34921
Atg3	12.8216	37.3264	49.5973	44.0334
Atg4a	11.5867	37.2594	33.8754	30.0756
Atg4b	0	8.3672	13.6286	11.3157
Atg4c	0.061098	2.12912	2.1085	2.42535
Atg4d	31.1836	7.74171	3.30267	10.0746
Atg5	5.41342	12.4507	6.61661	14.2616
Atg7	6.33548	4.62593	9.47013	3.4596
Atg9a	35.6002	3.46671	5.63843	5.13286
Atg9b	0	0.431389	0	0.008323
Atic	0	4.17634	0.170826	6.74547
Atl1	0	0.402153	0	0.849309
Atl2	27.4801	5.39295	13.9817	8.24464
Atl3	0.657379	1.39612	1.2449	1.60564
Atm	0.001547	0.728094	0.70852	1.13259
Atmin	2.34978	2.08148	0.072908	1.01511
Atn1	2.02848	3.52431	1.36702	4.65285
Atoh1	0	0	0	0
Atoh7	0	0	0	0
Atoh8	0	0.347982	0	4.00792
Atox1	116.422	451.515	348.288	242.246
Atp10a	0.010385	1.98902	1.34253	3.51582
Atp10b	5.30873	6.05778	1.49234	6.4589
Atp10d	0.312091	0.358886	0.211616	0.561105
Atp11a	0.35237	11.6776	7.59314	5.15014
Atp11b	0.465166	1.15451	3.59824	2.89879
Atp11c	0	0.142872	0.519191	0.669693
Atp12a	0	0.540958	0	0.00452
Atp13a1	2.44466	5.96058	2.68927	6.78193
Atp13a2	0.75339	3.74686	1.56086	2.39148
Atp13a3	0.07536	1.36616	2.13557	1.77833
Atp13a4	1.09432	4.79549	14.7699	5.51668
Atp13a5	0	0.022791	0	0.20301
Atp1a1	22.2975	35.4603	30.26	39.8876
Atp1a2	0.554694	0.356871	4.67969	9.13785
Atp1a3	0	0	0	0.042858
Atp1a4	0	0	0	0
Atp1b1	9.353	50.1794	11.3013	24.9411
Atp1b2	0.005317	0.123832	0.545829	1.62698
Atp1b3	2.46853	24.0703	29.0871	114.67
Atp1b4	0	0	0	0.028467
Atp23	0	0.88427	0.009986	4.42671
Atp2a1	0	0.012876	0.245717	0
Atp2a2	8.5385	9.86332	4.3943	20.2668
Atp2a3	0	0	0.348971	2.35661
Atp2b1	0.724201	0.949313	4.09967	2.45214
Atp2b2	0	0	0.00457	0.188476
Atp2b3	0.013531	18.8453	8.55138	4.9939
Atp2b4	16.3097	13.0824	16.3603	10.0139
Atp2c1	2.4956	1.94572	2.19206	4.43614
Atp2c2	0	0.022905	2.40261	0.057936
Atp4a	0.219453	23.2822	12.8033	6.54454
Atp4b	0	0	0	0
Atp5a1	25.478	154.3	115.89	188.347
Atp5b	36.001	293.45	268.686	292.344
Atp5c1	9.11223	214.695	223.623	202.309
Atp5d	50.2116	229.281	197.117	201.786
Atp5e	65.2716	266.067	216.047	158.281
Atp5g1	64.0435	177.283	87.4581	75.8685
Atp5g2	1.04323	11.0799	4.25518	7.85255
Atp5g3	38.8216	187.513	98.429	236.734
Atp5h	68.7591	282.444	167.08	207.586
Atp5j	114.261	490.885	258.018	229.935
Atp5j2	98.7748	214.907	193.89	131.626
Atp5k	123.559	294.369	114.109	107.058
Atp5l	15.5029	112.527	73.7369	33.1579
Atp5md	54.6289	450.057	183.123	150.88
Atp5mpl	20.6987	303.083	222.415	160.422
Atp5o	114.536	178.058	105.516	147.018
Atp5pb	59.6432	82.534	66.1579	86.1323
Atp6ap1	27.8729	81.7384	128.883	88.659
Atp6ap1l	0	0	0	0
Atp6ap2	4.38153	20.0487	27.9087	44.3093
Atp6v0a1	3.57507	19.5777	4.57363	6.69924
Atp6v0a2	2.05829	4.93799	4.12744	6.07351
Atp6v0a4	0.012465	0.788851	0.171858	0.745375
Atp6v0b	86.3276	145.425	53.3906	143.953
Atp6v0c	9.06882	60.0502	34.4887	43.9853
Atp6v0d1	27.9913	40.1961	34.8164	81.4356
Atp6v0d2	0	10.3457	1.35164	7.01966
Atp6v0e	181.531	365.014	203.451	324.316
Atp6v0e2	0.102991	43.4254	9.17751	19.4421
Atp6v1a	1.64795	16.7608	20.4127	31.1046
Atp6v1b1	0	0.739404	0	0
Atp6v1b2	26.0151	23.145	12.7445	24.0169
Atp6v1c1	10.6765	19.1943	9.23481	29.1967
Atp6v1c2	0	14.271	14.2107	12.1126
Atp6v1d	312.553	73.4198	55.9565	58.4894
Atp6v1e1	39.8813	93.7048	83.5118	110.011
Atp6v1e2	0	0	0	0
Atp6v1f	85.5885	172.845	128.529	143.048
Atp6v1fnb	0	0.33714	0	0.565535
Atp6v1g1	535.565	261.384	140.365	137.243
Atp6v1g2	14.9864	5.80433	0.001994	7.27635
Atp6v1g3	0	7.02092	0	0.484446
Atp6v1h	66.679	17.863	22.7825	17.3898
Atp7a	2.86136	3.41674	1.11376	5.88581
Atp7b	0	0	0.00331	0.003791
Atp8a1	0.001148	0.622361	0.156323	0.750971
Atp8a2	1.94891	0.650061	0	0.751198
Atp8b1	0.466818	0.793882	0.011785	2.30648
Atp8b2	0.002747	1.05643	0.428384	1.24882
Atp8b3	0	0.907998	2.38745	0.55179
Atp8b4	0	0.018564	0	0.046464
Atp8b5	0.122818	0.353135	3.3575	0.382519
Atp9a	9.11365	22.9559	5.26356	16.1607
Atp9b	1.01059	5.70429	0.399263	4.86128
Atpaf1	1.96519	1.24453	1.62113	1.23655
Atpaf2	9.96916	7.9026	2.85335	11.2197
Atpif1	32.6843	122.096	88.9183	71.5686
Atpsckmt	0	24.2456	20.2089	13.3139
Atr	0.008016	1.4004	0.995522	1.35383
Atraid	12.0117	153.595	89.7389	144.467
Atrip	4.62049	5.73231	1.51628	6.09208
Atrn	0.247607	1.04389	1.10846	1.11698
Atrnl1	0.057185	1.71477	2.65616	3.28492
Atrx	0.36903	7.034	8.04928	10.5668
Atxn1	46.9144	2.17545	5.76775	5.05284
Atxn10	3.32133	32.3895	19.816	38.0631
Atxn1l	0.326119	1.47949	0.677378	1.13145
Atxn2	8.08176	1.09479	4.25842	2.43745
Atxn2l	4.11233	3.60918	6.02425	3.64812
Atxn3	1.5367	1.66332	2.26885	2.61284
Atxn7	0.029687	1.64583	2.8109	3.77777
Atxn7l1	0.026217	0.341957	0.099357	0.437479
Atxn7l1os2	0	0.2112	0	0.021003
Atxn7l2	3.32151	2.37395	0	1.04174
Atxn7l3	2.74936	4.21948	4.22498	4.06086
Atxn7l3b	19.3184	31.1693	34.8647	30.6205
AU015228	0.027462	0	0	0.078953
AU015791	2.35094	16.5392	2.35963	13.1985
AU015836	0	0	0	0
AU016765	0	0	0	0
AU018091	0	0	0	0.538256
AU019990	0	0	0	0
AU021063	0	0	0	0.130899
AU021092	0	0.492368	0	2.04621
AU022252	1.41143	2.73049	0.033413	1.88027
AU022751	0	0.338476	0.03398	0
AU022754	0	0.048376	0.518448	0.031099
AU022793	0	0	0	0
AU023762	0	0	0	0
AU040320	0.403815	5.33503	0.600288	2.62836
AU040972	0	0	0.01903	0
AU041133	0	1.49815	0	0.421648
Auh	8.62153	18.855	8.50227	16.347
Aunip	0	0.212182	0.248052	0.185384
Aup1	22.0763	72.5802	60.8227	49.4588
Aurka	0	0.848556	0	0.559873
Aurkaip1	37.3024	119.807	43.9069	90.0013
Aurkb	0	0.195372	0	0.361927
Aurkc	0	0.125785	0.00723	0.028228
Auts2	35.1644	13.397	19.4035	11.7391
AV039307	0	0.096257	0.01943	0.165124
AV051173	1.23409	9.87925	6.75586	7.16257
AV064505	0	0.268724	0	0.21774
AV205837	0	0	0	0
AV320801	0	0	0	0
Aven	0.002415	0.088764	0.002272	6.54829
Avil	0	0.114404	0.024338	0.267674
Avl9	0.053103	2.28072	1.73769	2.2748
Avp	0	0	0	0
Avpi1	19.2609	38.4308	26.1733	54.7787
Avpr1a	0	0.174135	0	0
Avpr1b	0	0	0	0.006263
Avpr2	0	0	0.007459	0.011649
AW011738	0.688586	2.06154	1.40898	1.36581
AW046200	0	0.475594	0	0
AW112010	0	1.44322	0	12.2376
AW146154	0.561497	2.14493	0	0.924437
AW209491	6.41437	7.37691	6.50549	6.01207
AW495222	0	0	0	0.044438
AW549542	38.1366	6.208	17.0641	7.95335
AW549877	2.47189	4.03162	2.95036	5.4224
AW551984	0	0.117018	0	0.998028
AW554918	1.26237	1.32314	0	1.1813
AW822252	0	0	0	0.707465
Awat1	0	0	0	0
Awat2	0.417086	0.343951	0	0.183384
Axdnd1	0	0.101772	0	0.191665
Axin1	0.436563	6.01234	1.0163	3.7785
Axin2	2.38055	2.8132	2.51718	2.25978
Axl	0.003377	1.1247	6.69111	18.5734
AY074887	0	11.3543	15.4739	4.78507
AY358078	0	0.073271	0	0.051123
AY512915	0	0	0	0
AY512931	0	0	0	0.035254
AY702102	0	0	0	0
AY702103	0	0.040834	0	0.009395
AY761185	0	2716.02	552.503	145.894
Aym1	0	0	0	0
Azgp1	0	2.43285	99.432	27.0582
Azi2	8.07304	3.43203	1.57683	3.84527
Azin1	12.7051	18.2319	38.3425	51.7767
Azin2	0	0.590068	0.008724	0.490146
B2m	134.364	1452.57	1759.51	1285.71
B3galnt1	0	0	0	1.94602
B3galnt2	1.33197	3.35609	5.7421	3.89358
B3galt1	0.694332	0	0	1.27982
B3galt2	0	1.08694	0.531201	1.09631
B3galt4	0	3.2373	10.8149	2.46491
B3galt5	0	0.001872	0.001008	0.019434
B3galt6	2.74699	3.92234	0	3.7634
B3gat1	0.010253	0.304674	1.98039	0.085701
B3gat2	0.703354	1.84952	3.36903	3.71072
B3gat3	7.00297	14.6421	11.7195	13.7811
B3glct	0	0.786747	8.04725	5.2808
B3gnt2	2.60211	2.88708	18.2257	17.8013
B3gnt3	0	0	0	0.477381
B3gnt4	0.059406	0.181588	0.012421	0.189414
B3gnt5	0	0	0	0.02433
B3gnt6	0	0	0.449347	0
B3gnt7	11.0796	2.70276	0	3.48728
B3gnt8	4.02417	1.23377	5.37999	1.36194
B3gnt9	0.363293	0.360924	6.63312	11.3645
B3gntl1	1.15238	5.48226	0.81515	4.9928
B4galnt1	17.4574	16.5117	8.76356	13.3497
B4galnt2	10.1592	7.2473	6.50481	13.1224
B4galnt3	0	0	0	0.002554
B4galnt4	1.478	2.28883	1.14247	2.3584
B4galt1	236.719	10.1349	7.64694	20.1967
B4galt2	0	0.676222	0	2.42334
B4galt3	582.741	35.3326	50.6409	25.426
B4galt4	23.3162	26.8005	33.0224	30.6724
B4galt5	8.22216	1.67009	13.4687	10.575
B4galt6	0	0	0	0.888178
B4galt7	0.142999	4.86785	4.59498	3.51004
B4gat1	0	7.40096	3.678	12.1264
B9d1	0.05671	10.6729	0	11.7764
B9d2	10.3009	17.5483	23.3672	16.7744
Baalc	0	0.093983	0	0.144485
Baat	0	0	0	0
Babam1	3.43079	32.752	21.8857	29.2289
Babam2	18.0562	36.2596	15.6424	43.8266
Bace1	35.3098	2.38996	1.05387	9.92844
Bace2	0	0.322397	1.75919	4.20173
Bach1	0.678476	1.22879	1.6103	2.07579
Bach2	0.03406	0.318159	2.20608	1.29125
Bach2os	0	0.048893	0.000626	0.520058
Bad	6.84417	48.0606	26.6306	25.7756
Bag1	94.8709	137.414	56.0138	89.2031
Bag2	5.03897	30.5929	26.399	30.5151
Bag3	14.359	32.0824	77.6039	111.911
Bag4	2.27727	4.22931	7.31595	3.71888
Bag5	9.5873	22.8617	14.2013	18.0406
Bag6	10.3683	18.0371	15.1889	12.0037
Bahcc1	0.000246	0.016855	0.02616	0.05432
Bahd1	0.495178	4.46087	6.18038	3.50778
Baiap2	0.317595	31.9193	39.2865	28.3916
Baiap2l1	0.109802	9.06373	14.5064	3.27792
Baiap2l2	0	0	0.304079	0.251551
Baiap3	0	0.272433	0	0.159962
Bak1	0.039176	2.23163	2.09788	1.67829
Bambi	2.9337	5.90332	17.308	12.866
Banf1	57.1643	121.895	45.8633	87.8941
Banf2	0	0	0	0
Bank1	0	0	0	0.130712
Banp	0	2.58358	4.67388	2.86763
Bap1	3.80556	9.86255	16.0358	10.138
Bard1	9.17338	0.392316	0	0.368375
Barhl1	0	0	0	0
Barhl2	0	0	0	0
Barx1	0	0	0	0
Barx2	0	0	0	0
Basp1	3.65074	78.4788	28.6585	43.1135
Batf	0	0.208255	0	5.14236
Batf2	0.015205	0.19652	1.48025	1.51858
Batf3	0	0	0	1.2862
Bax	10.7038	84.5541	30.4872	58.8517
Baz1a	0.190467	1.48696	0	3.35595
Baz1b	3.58338	3.13423	2.24843	4.65584
Baz2a	0.954394	1.99898	2.36573	1.65476
Baz2b	9.31134	3.33707	5.74735	6.55264
BB014433	0	0	0	0.133771
BB019430	0	0	0	0.341964
BB031773	0.027104	0.021211	0	0
BB123696	0	0.502213	0	0.25819
BB218582	0	3.98759	0	1.32503
BB283400	0	0.380075	0.021997	0.270238
BB287469	0	0	0	0
BB557941	0	0.171304	0	0
Bbc3	5.62374	4.17712	7.46451	9.93785
Bbip1	3.27399	7.49509	3.34608	8.57235
Bbof1	0.237637	1.31868	0.027535	1.03432
Bbox1	0	0	0	0
Bbs1	1.11084	0.13982	0	0.291265
Bbs10	0	0.290968	0.09026	0
Bbs12	0.079231	1.21025	0	0.344222
Bbs2	0.00549	9.3896	6.27546	9.31841
Bbs4	0.073812	2.97736	0.304309	6.22899
Bbs5	6.04092	12.1167	0.507065	6.88325
Bbs7	8.44383	1.30862	0	1.35685
Bbs9	0.156455	0.216542	0.218464	0.567204
Bbx	1.69601	8.0597	8.83498	7.98212
BC003965	6.79182	7.39137	8.47022	5.53395
BC004004	6.43368	21.3587	14.3025	21.5256
BC005537	20.0249	8.12515	18.366	16.0743
BC005624	62.3471	32.8724	34.2722	21.5973
BC006965	0	0	0	0.687084
BC016548	0	0	0	0
BC016579	0	0.343545	0	1.49631
BC017158	1.81638	11.7077	4.47787	9.61521
BC018473	0.008096	0	0.00701	0.006967
BC021767	121.616	4.95557	1.644	7.14565
BC024063	0.137285	0.040262	0	0.124661
BC024139	0	6.3645	1.97852	0.795551
BC024386	0	0.061779	0	0
BC024978	18.5826	8.77039	8.22925	5.52227
BC025920	0	0.140624	0	0.199312
BC028528	0	0.235032	30.2397	4.31156
BC029722	6.64808	30.5484	12.0993	23.4656
BC030500	0	0	0	0.492679
BC031181	22.3838	113.366	108.428	92.2301
BC031361	0	0.526842	4.67625	0.745895
BC034090	0.08946	1.90486	0.291935	1.09579
BC035044	0	0	0.004378	0.038542
BC037032	0	0.407318	1.72994	0.407901
BC037156	0	0	0	0.007552
BC037704	4.68039	1.45582	3.24688	0.889662
BC039771	0	0.118679	0	0.00857
BC039966	0	0	0	0
BC042761	0	0	0	0
BC046251	0	0	0	0
BC048403	0	1.11568	0	1.20508
BC048507	0	0	0.236452	0
BC048559	0	0	0	0.136256
BC048562	0	0.128956	0	0
BC048602	0	0	0.136539	0.144379
BC048644	0.110462	0.378942	0.040944	0.048137
BC048671	0	0	0	0
BC048679	0	3843.45	846.972	347.288
BC049352	0	0.057161	0	0.070596
BC049715	0	0	0	0.034153
BC049762	0	1.01345	0.261052	2.28833
BC051019	0.357085	0.233803	0	0.08361
BC051142	0	0.322459	1.17592	1.05141
BC051226	1.30987	9.32081	8.60096	2.74485
BC051537	0.011086	0	0.165801	0
BC051665	0	0	0	0.045772
BC052040	3.94251	1.18738	0.012386	0.561558
BC052688	0	0	0	0
BC053393	0	0.077693	0	0.063581
BC055324	1.79851	0.30542	0.004023	0.487598
BC055402	0	0.077091	0	0
BC061195	0	0	0	0
BC061212	0	0	0	0
BC061237	0	0	0	0
BC064078	0	5.7614	0	7.65879
BC065397	7.73771	12.4596	8.0935	6.9234
BC065403	0	0	0	0
BC080695	0	0	0	0.142065
Bc1	0	0.904019	0	0
BC106179	0	0.181156	0	0.152012
BC107364	0.593766	0.232503	0	0
BC147527	0	0	0	0
Bcam	2.14457	19.3205	28.7869	24.4697
Bcan	0	0	0	0
Bcap29	1.31627	4.67309	2.99015	10.842
Bcap31	44.4411	79.5748	76.3962	109.832
Bcar1	12.0317	9.05347	20.2103	14.8675
Bcar3	0.726775	0.25058	0.00619	0.413196
Bcas1	0	0.062119	0	0.235937
Bcas1os2	0	0	0	0
Bcas2	5.71253	34.3014	8.96021	32.7265
Bcas3	3.10167	7.80285	6.21247	6.86614
Bcas3os1	1.60963	0.327026	0.013585	0.265445
Bcas3os2	0	0.274892	0	0.91303
Bcat1	0	1.33405	0.037856	0.311235
Bcat2	0.32403	3.79051	6.6048	13.5596
Bccip	8.10681	27.0984	17.5604	29.5473
Bcdin3d	0	6.10201	1.37262	1.823
Bche	0	1.51366	1.17683	1.76911
Bckdha	12.4488	33.129	31.5384	24.7577
Bckdhb	6.66678	9.36117	0.414961	18.4392
Bckdk	8.84528	20.4003	16.6649	13.3881
Bcl10	0.401595	14.0828	26.4125	24.5565
Bcl11a	0	0	0	0.065939
Bcl11b	0	0.221307	0.1908	0.266828
Bcl2	5.95948	1.57888	6.20097	10.034
Bcl2a1a	0	0	0	0
Bcl2a1b	0	0	0	0
Bcl2a1c	0	0	0	0
Bcl2a1d	1.25948	1.51181	0.710542	2.09696
Bcl2l1	267.705	8.23159	22.3457	27.5939
Bcl2l10	0	0	0.103292	0
Bcl2l11	0.320908	3.50786	5.03921	3.85203
Bcl2l12	0.809726	3.35146	2.27821	1.65241
Bcl2l13	1.51139	1.91093	4.05124	2.60314
Bcl2l14	0.017144	0.249266	0.606965	0.333201
Bcl2l15	54.0742	162.447	90.4456	106.826
Bcl2l2	0.104189	6.45597	3.79407	5.2169
Bcl3	0	0.770467	17.5897	21.3967
Bcl6	0.003156	0.419713	5.68041	0.771766
Bcl6b	0	0.320008	0	1.0365
Bcl7a	1.54871	1.93438	0.296976	1.89696
Bcl7b	8.34704	16.5537	0.226535	26.2504
Bcl7c	4.6916	8.18516	15.8361	7.03954
Bcl9	0.288549	0.491825	1.01192	0.428946
Bcl9l	0.815382	3.79357	4.62006	2.54901
Bclaf1	3.11425	12.1253	21.7124	20.2443
Bclaf3	0	2.96801	2.97058	4.12342
Bco1	0.005216	0	0	0.018596
Bco2	0	0	0	0.111788
Bcor	0	0.096541	1.13532	0.77688
Bcorl1	0.72481	0.295915	0.183325	0.616084
Bcr	0.698728	2.25652	0.553801	3.11603
Bcs1l	0	6.54201	7.25486	4.63599
Bdh1	4.17305	1.10709	0.334821	0.583443
Bdh2	0.013536	1.23572	17.5797	27.3968
Bdkrb1	2.54972	0.581895	0	1.2752
Bdkrb2	0	0	0.197417	1.55026
Bdnf	0	0.324106	8.69873	1.94968
Bdp1	1.63788	1.17763	2.15976	2.13615
Bean1	0	0	0.634361	1.75443
Becn1	23.2546	54.3942	29.6172	44.3037
Becn2	0	0	0	0
Begain	0	0.085379	0	0.111099
Bend3	1.40685	0.2879	1.08982	0.573319
Bend4	48.3197	1.51332	2.22875	0.588507
Bend5	6.44584	4.37049	4.29248	7.73721
Bend6	0	0	0	0
Bend7	0	0.834104	0.418098	0.68681
Best1	0	0.24645	0	0.903882
Best2	0.008961	0.121879	0	0
Best3	0	0.130333	0	0
Bet1	17.94	22.9599	21.6536	15.7866
Bet1l	15.4241	68.0818	58.4062	52.8502
Bex1	0	2.10999	0.051625	8.72043
Bex2	19.592	120.425	48.7444	54.9146
Bex3	68.7321	134.095	166.118	133.983
Bex4	2.81218	32.2043	25.7538	16.5598
Bex6	0	0	0	0
Bfar	1.00609	7.65581	17.5959	16.4356
Bfsp1	0	1.18619	0.004786	0.919199
Bfsp2	0	0	0	0
Bglap	0	0.169543	0.019535	0
Bglap2	0	0	0	0
Bglap3	37.5996	96.1365	84.0316	127.117
Bgn	0	4.53695	322.027	612.517
Bhlha15	0	0.123611	0	0
Bhlha9	0.013132	0	0	0
Bhlhb9	2.4276	7.33317	2.06797	7.54059
Bhlhe22	0	0.145803	3.1031	1.88483
Bhlhe23	0.005766	0	0	0.196521
Bhlhe40	54.0888	61.5907	95.3633	158.83
Bhlhe41	562.078	8.03406	4.7056	17.9955
Bhmt	0.028063	0.130119	0	1.32814
Bhmt2	0	0	0	1.07134
Bicc1	0	2.38134	14.915	17.8904
Bicd1	1.09071	0.67266	0	0.769684
Bicd2	0	1.8643	1.21024	3.95473
Bicdl1	0.842053	8.76265	4.73449	2.58282
Bicdl2	4.31822	1.87521	0.230029	1.14221
Bicra	0.145395	0.351924	0.6114	0.190846
Bicral	0.413187	0.883716	2.47809	0.894906
Bid	5.45427	2.26549	0	4.09484
Bik	0	0.360138	0.484013	5.07432
Bin1	1.50434	4.87777	8.82614	9.43143
Bin2	0	0.430448	0	0
Bin3	7.97353	13.397	2.84015	9.71049
Birc2	3.13075	4.30021	3.99001	16.0472
Birc3	1.07324	4.45569	23.8903	25.8287
Birc5	0.02784	0.373896	0.057524	6.40322
Birc6	25.7008	1.63712	2.38559	2.65285
Birc7	0	0	0	0
Bivm	0	1.79941	5.05395	1.36465
Blcap	2.41053	6.93759	6.49461	8.70014
Blk	0	0	0	0
Blm	0	0.847847	1.30077	0.272151
Blmh	0	17.2987	18.3387	12.7525
Blnk	0.137051	4.22556	0	4.21911
Bloc1s1	16.7967	26.3567	75.9446	39.8577
Bloc1s2	16.9682	28.4119	4.78814	15.075
Bloc1s3	0.508463	2.28028	0.817653	1.10964
Bloc1s4	11.5238	25.5714	4.52178	13.4286
Bloc1s5	0.154866	6.16636	10.1726	9.91972
Bloc1s6	2.37788	4.14254	0	3.6257
Bloc1s6os	0	1.08136	0	0.42452
Bloodlinc	0	0.158125	0	0
Blvra	1.20572	3.7829	11.8374	7.67031
Blvrb	0.138895	12.6578	0.026995	17.7102
Blzf1	0	9.12588	12.358	7.28572
Bmerb1	0	0.08151	0	0.018616
Bmf	0.019467	2.32844	0.341796	1.02802
Bmi1	0.959601	1.19144	3.75492	1.10326
Bmp1	0.002585	1.60852	3.81107	8.75054
Bmp10	0	0	0	0
Bmp15	0	0	2.42906	0.265234
Bmp2	0	0.15838	18.7523	19.4695
Bmp2k	1.04113	1.40507	0.512563	1.29788
Bmp3	0	0	0.012208	1.62371
Bmp4	4.86908	4.07149	66.8447	68.1124
Bmp5	0	0	0.013855	0.084008
Bmp6	0	0	0	1.12674
Bmp7	3.51921	4.89439	19.8374	26.3931
Bmp8a	0.161807	2.0718	0.155087	1.45999
Bmp8b	0	0	0	0
Bmper	0	0	0	0.142491
Bmpr1a	2.46197	2.41784	0.209797	4.72746
Bmpr1b	0.824401	0.973617	1.79409	1.5027
Bmpr2	0.202415	1.25921	1.48475	4.20112
Bms1	1.62429	3.4495	3.19593	3.53029
Bmt2	0.022966	0.806743	0	1.11005
Bmx	0	0	0	0.06484
Bmyc	318.166	412.156	107.248	308.013
Bnc1	0	0	0	0.015669
Bnc2	0	0.077361	0.060829	0.205177
Bnip1	0.955655	8.76412	3.6164	11.4902
Bnip2	1.20704	2.90477	6.41362	9.4993
Bnip3	1.67592	32.1527	32.3115	19.4004
Bnip3l	5.44801	13.1509	10.9182	12.6943
Bnip5	0	0.016873	0	0.025801
Bnipl	2.2118	0.852657	0.765812	0.652028
Boc	0.022074	1.33801	1.313	4.46191
Bod1	45.5692	24.447	18.1946	16.0982
Bod1l	0.570566	1.66215	1.38619	1.87764
Bok	6.65436	2.50277	46.3773	43.1997
Bola1	48.2871	73.3725	27.1945	35.2406
Bola2	22.1805	153.9	39.573	59.822
Bola3	3.7821	19.5315	16.9141	8.82698
Boll	0.002199	0.017545	0.000346	0.103036
Bop1	5.71682	13.5541	1.09971	15.106
Bora	0.05775	4.44677	0.166763	1.12636
Borcs5	4.15493	2.14497	0.633821	4.9757
Borcs6	12.1261	19.3318	21.331	16.2903
Borcs7	8.45274	15.032	7.07859	10.587
Borcs8	10.862	25.7868	15.2895	20.3751
Bpgm	16.4554	30.9407	10.1764	21.7093
Bphl	6.13458	37.8515	53.5393	34.3464
Bpi	66.8155	54.5785	11.9298	85.3537
Bpifa1	0	0	0	0
Bpifa2	0	0	0	0
Bpifa3	0	0	0	0
Bpifa5	0	0	0	0
Bpifa6	0	0.054009	0	0.074369
Bpifb1	0	0	0	0
Bpifb2	0	0	0	0
Bpifb3	0	0	0	0.049932
Bpifb4	0	0	0	0
Bpifb5	0	0	0	3.50829
Bpifb6	0	0	0	0
Bpifb9a	0	0	0	0
Bpifb9b	0	0	0	0
Bpifc	5.35215	0.989449	0	1.9048
Bpnt1	0.480478	11.8488	14.4902	11.1902
Bptf	2.5813	3.02202	4.585	5.60239
Braf	9.28332	6.05053	8.59433	4.61643
Brap	3.82738	8.21165	1.03584	13.3239
Brat1	0.800484	2.04537	0	1.17224
Brca1	0	0.19601	0.001721	0.389076
Brca2	0.017203	0.277195	0.514848	0.232188
Brcc3	1.59018	5.37685	7.07247	20.5575
Brd1	0.257387	2.87222	3.64043	2.98223
Brd2	119.387	38.1842	62.9839	45.4864
Brd3	0.262751	6.64918	6.32913	5.55593
Brd3os	5.05701	5.85431	0.468617	1.62462
Brd4	1.22978	1.14021	2.26673	2.93873
Brd7	7.13718	29.7416	7.99816	14.2825
Brd8	10.609	9.80487	20.4264	9.25725
Brd8dc	3.93525	0.266298	1.28584	0.453656
Brd9	5.12083	10.0678	5.66391	9.08223
Brdt	0	0.261522	1.26542	0.571612
Brf1	5.9389	18.4329	6.24116	14.2457
Brf2	0	4.0384	0	5.18344
Bri3	10.0053	13.5227	6.29913	7.65788
Bri3bp	3.67361	9.07845	5.99928	6.22571
Bricd5	1.04778	1.68094	0	1.45163
Brinp1	0	0.080344	0	0.047443
Brinp2	0.022224	0.146719	0	0.102546
Brinp3	0	0.042237	0	0.084716
Brip1	0	0.026622	0.021445	0.19954
Brip1os	0.936871	2.09981	4.21451	2.55633
Brix1	72.8865	22.6909	17.0068	23.5457
Brk1	10.5441	143.544	100.699	96.4263
Brms1	5.23714	25.1456	13.7381	18.4711
Brms1l	3.56899	4.96406	0.488456	6.11407
Brox	1.23103	2.9496	0.928065	5.85824
Brpf1	0.44631	8.18196	5.73919	5.69343
Brpf3	0.694825	1.43565	0	0.980535
Brs3	0	0	0	0.111294
Brsk1	0.185852	0.083474	0.004898	0.330965
Brsk2	0	0	0.090973	0.073957
Brwd1	0.453764	6.82899	19.1922	7.02
Brwd3	0.367196	0.292127	0.323582	0.732246
Bscl2	0.506765	43.1152	47.7954	42.7391
Bsdc1	11.8903	8.53647	5.57773	9.81617
Bsg	192.605	222.802	177.408	276.466
Bsn	0.278315	0.426421	0.20191	0.114415
Bsnd	0	0.046246	0	0
Bsph1	5.24945	212.424	18.0057	15.2048
Bsph2	0	281.348	114.27	120.936
Bspry	21.0877	21.7708	21.8709	17.2366
Bst1	0	0	0	0
Bst2	0	17.6245	59.6282	52.9085
Bsx	0.013587	0	0	0
Btaf1	0.307205	3.60768	6.64307	4.61315
Btbd1	2.18048	5.05924	8.83338	4.05901
Btbd10	6.93729	6.04337	3.63749	8.23007
Btbd11	0	0.361156	0.117566	0.368276
Btbd16	0	0.128919	0	0.076082
Btbd17	0.690829	1.38836	0	2.35726
Btbd18	0.027769	0.083895	1.50164	0.279998
Btbd19	33.7015	1.05632	3.03739	1.46695
Btbd2	17.1648	3.12782	8.38727	3.78723
Btbd3	0	0.602353	0.387316	0.975626
Btbd35f1	0	0	0	0
Btbd35f10	0	0	0	0
Btbd35f11	0	0	0	0
Btbd35f12	0	0	0	0
Btbd35f13	0	0	0	0
Btbd35f14	0	0	0	0
Btbd35f15	0	0	0	0
Btbd35f16	0	0	0	0
Btbd35f17	0	0	0	0
Btbd35f18	0	0	0	0
Btbd35f2	0	0	0	0
Btbd35f20	0	0	0	0
Btbd35f21	0	0	0	0
Btbd35f23	0	0	0	0
Btbd35f26	0	0	0	0
Btbd35f27	0	0	0	0
Btbd35f28	0	0	0	0
Btbd35f3	0	0	0	0
Btbd35f4	0	0	0	0
Btbd35f5	0	0	0	0
Btbd35f6	0	0	0	0.025384
Btbd35f7	0	0	0	0
Btbd6	6.01445	4.71015	8.69859	5.80683
Btbd7	2.53868	1.05873	4.41736	3.73273
Btbd8	0	0	0	0.083046
Btbd9	1.80997	5.71504	4.03534	6.69588
Btc	0	0	0	0.108963
Btd	0	4.75017	1.09216	9.43794
Btf3	16.0669	67.7586	35.9545	91.1302
Btf3l4	1.39129	5.03869	1.04239	3.36335
Btg1	44.3245	19.0268	33.814	23.6622
Btg1b	0	0	0	0.177133
Btg1c	0	0	0	0
Btg2	611.732	211.967	172.84	237.318
Btg3	1.00492	2.81761	0.61397	1.13013
Btg4	0.081802	0	0.425636	0.157715
Btk	0	0	0	0.32218
Btla	0	0.162034	0	0.163125
Btn1a1	0	0	0	0.137507
Btn2a2	0	0	0	0.040823
Btnl1	0	0	0	0
Btnl10	0	0	0	0
Btnl2	0.005154	0	0	0
Btnl4	0	0	0	0
Btnl6	0.022015	0	0	0
Btnl9	0	0	0	0.096908
Btrc	0.642896	9.03482	5.92347	9.32952
Bub1	0	0	0	0.047172
Bub1b	0	0.391374	0	0.528403
Bub3	6.0756	20.43	18.4069	19.8775
Bud13	0	2.0597	4.64753	2.21128
Bud23	4.22199	17.6345	20.651	9.91782
Bud31	12.0001	95.5385	39.065	73.0818
Bves	0.173839	0.150772	0	0.135218
Bvht	0	2.41385	10.345	3.82829
Bysl	0.865388	3.52427	0.053145	3.83819
Bzw1	4.68455	14.877	10.8938	22.2914
Bzw2	0.139783	7.30785	8.03245	13.2136
C1d	4.89219	13.6878	9.83794	11.5644
C1galt1	0	1.08329	0	2.30465
C1galt1c1	0	11.498	6.412	10.1991
C1qa	0	0.423047	0.008648	0.285126
C1qb	0	0.227369	0	1.78844
C1qbp	11.6702	71.4866	34.6981	74.7444
C1qc	0	0.777507	0	0.557669
C1ql1	0	0	0	0
C1ql2	0	0	0	0
C1ql3	0	0.084028	0.24587	0.149383
C1ql4	2.91071	0	3.06252	0.181167
C1qtnf1	0	0.030753	1.93373	0.91348
C1qtnf12	7.20431	14.0111	5.99494	14.005
C1qtnf2	0	0.527344	2.23563	16.2492
C1qtnf3	0	0.492859	24.3218	14.0634
C1qtnf4	0.097735	9.28937	2.44575	2.75615
C1qtnf5	0.006179	27.2059	25.993	12.4369
C1qtnf6	0	1.09009	3.09638	4.07805
C1qtnf7	0	0.042551	37.3389	29.3548
C1qtnf9	17.7336	6.77179	10.5685	9.0375
C1ra	0	1.43807	23.9731	48.3375
C1rb	0	0	0.08352	0.410801
C1rl	0	0.062547	8.33997	2.13079
C1s1	0	1.36774	24.3059	69.3079
C1s2	0	0.797356	0.013279	0.670345
C2	0	1.71167	31.7231	32.5062
C2cd2	0	1.19087	0.496374	1.99646
C2cd2l	10.3807	4.19869	0.080308	3.80976
C2cd3	0.004903	0.846304	0.117783	0.667609
C2cd4a	0.082066	0	0	0
C2cd4b	0.562116	1.11298	0	0.212426
C2cd4c	0	0.03935	0	0
C2cd4d	0	0.614299	0	0
C2cd5	0.421705	3.64991	2.4283	2.69563
C2cd6	0.003158	0.145146	0	0.116472
C3	0	0.485579	0	8.31825
C3ar1	0	0.044651	0	0.075162
C4a	0.041346	0.169886	1.83704	0.358203
C4b	0	0.047228	0.448996	0.917083
C4bp	103.522	1011.27	153.628	158.803
C4H1orf232	0	0	0	0
C5ar1	0	0	0	0.032221
C5ar2	0	0	0	0.171542
C6	0	0	0	0
C7	0.005364	0.103563	0.813253	11.6998
C77080	1.64975	3.4768	1.79222	3.50422
C86187	0.012843	0.131004	0.087441	0
C87198	0	0	0	0
C87414	0	0	0.019218	0
C87436	0.002067	2.69946	3.34746	1.69382
C87499	0.007949	0	0	0
C87977	0	0	0	0
C8a	0	0.050775	0	0.117925
C8b	0	0	0	0
C8g	0.043816	7.49782	9.40011	3.71598
C9	0	0	0	0.035876
C9orf72	0.515606	1.64596	0.07292	2.83261
Caap1	0.733401	4.17975	2.80258	2.5807
Cab39	7.63562	3.68229	6.62197	6.29555
Cab39l	0.89588	5.484	0.2467	9.34942
[truncated: 18,289 more rows]
